# Supplementary material for: Unraveling Anthropocene Paleoenvironmental Conditions Combining Sediment and Foraminiferal Data: Proof-of-Concept in the Sepetiba Bay (SE, Brazil)
Source: Frontiers journal article supplement (doi:10.3389/fevo.2022.852439), 2022-03-28
Supplement: Table_1.xlsx [file Table_1.xlsx]

## Sheet: SP5 
Table S1. Results of 210Pb and 137Cs
								Constant Sedimentation Model (CFCS)
z (cm)	210Pb (Bq kg-1)		226Ra (Bq kg-1)		137Cs (Bq kg-1)		Fallout maximum	ln (210Pbxs)		Datação (a)		v (cm a-1)
	Value	Error	Value	Error	Value	Error		Value	Error	Value	Error	Value	Error
0	38.3446	4.13387	85.3735	7.18942	2.26923	0.0809044		2.8486	0.128217	2015	0	0.827749	0.128975
3	37.1355	4.00435	36.058	4.02169	1.04446	0.037595		3.34045	0.144219	2011.38	0.56226
9	30.5104	3.71419	97.1201	8.20902	4.58698	0.160239		1.87624	0.138197	2004.13	1.61138
11	35.0758	4.01718	24.3085	3.63883	2.4904	0.0887339		3.36982	0.172676	2001.71	2.50473
14	55.277	6.03488	135.379	11.6029	9.56852	0.328159		3.08412	0.129973	2001	2.34754
17	78.203	7.39092	34.5112	4.68062	9.01182	0.302434		4.24393	0.152985	2000	3.39502
19	67.0402	7.32679	59.4364	7.74826	13.982	0.47002		3.95822	0.157101	1998	3.90475
22	71.9488	7.89782	70.7393	8.18886	13.0314	0.434667		3.99786	0.148015	1991	4.24003
24	113.201	10.5004	89.4803	9.46748	5.95624	0.208959		4.51202	0.13165	1989	4.07976
26.5	49.3846	5.49651	106.996	10.4424	15.0056	0.499141		3.13395	0.138047	1982.99	4.7391
29	34.2665	4.03177	48.3294	6.12744	9.24584	0.314534		3.10605	0.159538	1979.97	6.05992
34	22.9918	2.72934	74.2881	8.24213	11.893	0.398681		1.53646	0.15056	1973.92	6.67412
39	46.4464	5.28253	155.151	12.0407	14.0769	0.466207		2.09624	0.128999	1967.88	6.4873
45	#N/A		57.1984	7.82384	18.3289	0.608021	1963	#N/A		1960.64	10.5773
56	40.1228	4.58224	55.5021	6.93525	10.2587	0.347993		3.27404	0.15639	1947.35	11.4525
66	16.5555	2.1945	53.2289	6.8675	12.8887	0.429908		1.22724	0.169723	1935.27	14.749
77	20.1031	2.57429	81.4183	8.91129	13.634	0.455776		#N/A		1921.98	15.6704
97	52.2443	5.12551	130.34	8.13036	9.59299	0.312152		2.99872	0.109982	1897.81	13.6238
116	50.8554	4.79294	114.633	6.93212	6.46105	0.214331		3.1157	0.106141	1874.86	15.6926
130	43.1752	4.21311	118.768	6.09997	5.74462	0.188619		2.62815	0.104606	1857.95	17.3186
