# Supplementary material for: Unraveling Anthropocene Paleoenvironmental Conditions Combining Sediment and Foraminiferal Data: Proof-of-Concept in the Sepetiba Bay (SE, Brazil)
Source: Frontiers journal article supplement (doi:10.3389/fevo.2022.852439), 2022-03-28
Supplement: Table_2.xlsx [file Table_2.xlsx]

## Sheet: Sed. Data
Table S2. Textural, mineralogical and geochemical results along the core SP5.
Detection limit for geochemical data ►																																					0.01	1	1	1	0.1	0.01	0.1	1	0.2	1	0.1	0.01	0.1
Interval	Level	Age	Textural Group	Mean	Sorting	Skewness	Kurtosis	Sample Type	Skewness	Kurtosis	Mode 1	Mode 2	Mode 3	Sand Fraction	Fine Fraction	Coarse Sand	Medium Sand	Fine Sand	Anatase	Anhydrite	Calcite	Dolomite	K-Feldspars	Phyllosilicates	Magnetite/ Maghemite	Plagioclase	Pyrite	Quartz	Siderite	Zeolites	Ilmenite	TOC	S	C/S	IR	Carb.	Al	As	Ba	Be	Bi	Ca	Cd	Ce	Co	Cr	Cu	Fe	Hf
cm	cm	Year	Descriptio	(µm)	(µm)	(µm)	(µm)	Descriptio	Descrição	Descrição	(µm)	(µm)	(µm)	%	%	%	%	%	%	%	%	%	%	%	%	%	%	%	%	%	%	%	%		%	%	%	PPM	PPM	PPM	PPM	%	PPM	PPM	PPM	PPM	PPM	%	PPM
0-3 cm	0	2015	Sandy Mud	22.6575	3.10094	0.0479464	0.822646	Bimodal, Poorly Sorted	Symmetrical	Platykurtic	76.5	152.5		21.3258	78.6742	1.51267	1.22649	7.25073	0	2.13904	0.754954	0	4.9072	76.4391	0	0	3.01982	12.7399	0	0	0	1.67	1.18	1.41525	85	15.0794	7.77	13	171	3	0.3	0.58	3.4	83	11.9	66	23.1	4.78	2.4
3-9 cm	3	2011.38	Sandy Mud	26.5067	3.11661	-0.0931966	0.768486	Bimodal, Poorly Sorted	Symmetrical	Platykurtic	76.5	152.5		31.7867	68.2133	1.17348	1.38862	9.05814	4.38957	2.74348	0	0	0	65.8436	0	8.23045	7.13306	11.6598	0	0	0	1.8	1.24	1.45161	83.7302	16.2698	7.9	13	125	2	0.3	0.65	3.3	81	11.2	61	21.9	4.71	2.7
9-11 cm	9	2004.13	Sandy Mud	26.4396	3.15614	-0.0677231	0.768812	Bimodal, Poorly Sorted	Symmetrical	Platykurtic	76.5	152.5		30.9226	69.0774	1.47558	1.37256	10.629	0	0	0	0	16.4534	69.1042	0	1.75503	3.3638	9.32358	0	0	0.731261	1.79	1.12	1.59821	86.9565	13.0435	7.44	13	177	3	0.4	0.59	3.4	90	12.2	68	21.2	4.58	2.9
11-13 cm	11	2001.71	Sandy Mud	30.1716	3.60658	0.0682058	0.740233	Bimodal, Poorly Sorted	Symmetrical	Platykurtic	152.5	76.5		28.4057	71.5943	0.934318	1.71343	19.034	0	3.13849	0	0	4.23696	70.0275	0	0	2.35386	20.2432	0	0	0	1.49	1.16	1.28448	88	11.811	7.79	13	175	2	0.3	0.58	3.5	81	11.2	63	22.4	4.58	2.6
14-17 cm	14	2001	Sandy Mud	37.1147	3.46572	-0.190613	0.78747	Bimodal, Poorly Sorted	Fine Skewed	Platykurtic	76.5	152.5		42.4148	57.5852	1.54169	3.00565	16.259	2.33673	0	0	0	9.9311	55.4973	2.24685	11.3916	2.04464	16.5518	0	0	0	1.64	1.26	1.30159	84.8606	15.1394	7.65	14	126	3	0.3	0.46	3.8	71	11.7	69	21.6	4.71	2.3
17-19 cm	17	2000	Sandy Mud	26.2218	3.15798	-0.0543041	0.762738	Bimodal, Poorly Sorted	Symmetrical	Platykurtic	76.5	152.5		30.0697	69.9303	0.378707	1.31833	12.3187	0	0	0	0	1.78138	72.8745	0	0	2.26721	23.0769	0	0	0	1.73	1.3	1.33077	84.585	15.415	7.98	14	128	3	0.3	0.47	4.7	80	11.3	65	23.3	4.89	2.6
19-22 cm	19	1998	Sandy Mud	30.2913	3.5149	0.0206488	0.757663	Bimodal, Poorly Sorted	Symmetrical	Platykurtic	152.5	76.5		30.649	69.351	1.06926	1.52242	14.967	0	3.11615	0	0	5.09915	67.9887	0	3.08074	1.80595	18.9093	0	0	0	1.58	1.5	1.05333	88	12.253	7.81	14	163	3	0.3	0.42	4.6	77	10.6	67	23.1	4.83	2.5
22-24 cm	22	1991	Sandy Mud	27.952	3.14726	-0.123934	0.763698	Bimodal, Poorly Sorted	Fine Skewed	Platykurtic	76.5	152.5		34.2117	65.7883	0.540016	1.35879	13.1584	2.50241	0	0	0	1.41161	83.7344	0	2.6949	1.66827	7.98845	0	0	0	1.6	1.35	1.18519	84.9802	15.0198	7.62	14	235	3	0.3	0.36	4.5	83	11	87	21.4	4.61	2.3
24-26.5 cm	24	1989	Sandy Mud	26.4059	3.15879	-0.0595981	0.760577	Bimodal, Poorly Sorted	Symmetrical	Platykurtic	76.5	152.5		30.4315	69.5685	0.312695	1.07091	12.9575	0	0	0	0	3.01468	74.9702	0	0	1.66601	18.8417	1.50734	0	0	1.56	1.15	1.35652	84.252	15.748	8.35	14	266	3	0.3	0.39	4.3	85	11.7	72	21.5	4.82	2.3
26.5-29 cm	26.5	1982.99	Sandy Mud	28.0671	3.53372	0.0995796	0.791481	Bimodal, Poorly Sorted	Symmetrical	Platykurtic	152.5	76.5		24.8168	75.1832	0.526208	1.14393	14.9048	0	0	0	0	3.66442	77.1456	0	0	2.31437	15.8149	1.06075	0	1.35005	1.64	1.28	1.28125	85	15.4762	7.58	13	272	2	0.3	0.35	3.9	69	11.5	67	21.8	4.69	2.2
29-32 cm	29	1979.97	Sandy Mud	29.471	3.50295	0.0396577	0.763054	Bimodal, Poorly Sorted	Symmetrical	Platykurtic	152.5	76.5		29.0975	70.9025	0.884982	1.46844	14.1673	0	0	0	0	1.9019	81.0811	0	0	1.4014	12.9129	2.7027	0	0	1.47	1.01	1.45545	85.7143	14.2857	8.16	14	269	3	0.3	0.4	4.5	85	11.8	66	22.5	4.91	2.3
32-34 cm	32	1976.94	Sandy Mud	26.7372	3.19436	-0.0524213	0.762002	Bimodal, Poorly Sorted	Symmetrical	Platykurtic	76.5	152.5		30.6284	69.3716	0.926774	1.36322	13.4131	0	0	0	0	0	87.3521	0	0	1.45587	11.192	0	0	0	1.52	0.962	1.58004	84.4622	15.5378	8.33	14	233	3	0.3	0.38	4.2	80	12	67	22.9	4.82	2
34-36 cm	34	1973.92	Sandy Mud	24.9849	3.21901	0.0249479	0.786723	Bimodal, Poorly Sorted	Symmetrical	Platykurtic	152.5	76.5		25.6149	74.3851	1.16595	1.6255	12.2572	0	0	0	0	0	81.3953	0	0	2.71318	15.8915	0	0	0	1.41	1.01	1.39604	86	14.4578	7.99	13	279	3	0.3	0.31	4.2	80	10.7	62	19.8	4.83	2
36-39 cm	36	1970.9	Sandy Mud	39.0225	4.26217	-0.017194	0.834712	Polymodal, Very Poorly Sorted	Symmetrical	Platykurtic	76.5	152.5	605	42.4399	57.5601	6.68298	4.69088	15.6387	0	0	0	0	0	76.3984	0	2.72851	2.04638	18.8267	0	0	0	1.46	0.981	1.48828	83.6653	16.3347	7.86	14	270	3	0.3	0.34	4.1	85	12.1	62	21	4.85	2.3
39-41 cm	39	1967.88	Sandy Mud	42.1926	4.18137	-0.102172	0.828222	Polymodal, Very Poorly Sorted	Fine Skewed	Platykurtic	152.5	76.5	605	46.1666	53.8334	5.71063	4.75958	21.4886	2.849	0	0	0	2.46914	76.9231	0	3.60874	1.61443	12.5356	0	0	0	1.34	0.809	1.65637	86.5079	13.4921	8.41	13	298	3	0.3	0.36	3.6	92	12.3	67	21.1	4.89	2.2
41-43 cm	41	1965.47	Sandy Mud	33.2856	3.96794	0.0681005	0.708008	Polymodal, Poorly Sorted	Symmetrical	Platykurtic	152.5	76.5	302.5	33.9551	66.0449	3.64767	3.84781	17.6108	0	0	0	0	0	77.0403	1.60853	0	2.75144	14.1974	4.4023	0	0	1.22	0.74	1.64865	86	13.5458	7.73	12	256	2	0.3	0.34	3.7	75	12	64	19.7	4.71	2
43-45 cm	43	1963.05	Sandy Mud	41.2741	3.90323	-0.143589	0.756342	Polymodal, Poorly Sorted	Fine Skewed	Platykurtic	152.5	76.5	605	45.5674	54.4326	4.55091	4.05347	22.0306	3.16742	0	0	0	0	58.0694	0	9.35143	1.65913	27.7526	0	0	0	1.117	0.43	2.59767	86.8526	13.1474	8.03	12	279	3	0.3	0.36	3.6	77	12.5	69	20.7	4.94	2.4
45-47 cm	45	1960.64	Muddy Sand	50.5003	4.13811	-0.21978	0.910257	Polymodal, Very Poorly Sorted	Fine Skewed	Mesokurtic	152.5	76.5	605	55.0002	44.9998	10.2474	4.09215	23.9991	0	0	0	0	0	77.2871	0	3.15457	0.946372	17.8759	0.736067	0	0	0.973	0.355	2.74085	86.9048	13.0952	7.82	11	281	3	0.3	0.36	2.6	72	12.8	69	19.8	4.89	2.3
47-49 cm	47	1957.98	Sandy Mud	39.4528	4.2062	-0.0343418	0.798897	Polymodal, Very Poorly Sorted	Symmetrical	Platykurtic	152.5	76.5	605	42.9087	57.0913	5.03311	4.83736	22.1103	1.78571	0	0	0	5.7398	75.8929	0	0	1.27551	15.3061	0	0	0	0.89	0.3	2.96667	91	8.66142	7.58	11	250	3	0.2	0.36	1.8	71	11.9	65	19.8	4.83	2.2
49-52 cm	49	1955.32	Sandy Mud	44.3057	4.2062	-0.130874	0.819609	Polymodal, Very Poorly Sorted	Fine Skewed	Platykurtic	152.5	76.5	302.5	47.7569	52.2431	6.05268	6.36532	25.7093	0	0	0	0	0	82.922	0	2.17177	2.46792	12.4383	0	0	0	1.13	0.34	3.32353	85.259	14.741	7.77	9	267	3	0.2	0.37	1.4	73	11.6	65	18	4.85	2.2
52-54 cm	52	1952.66	Sandy Mud	42.0368	3.92775	-0.144394	0.731532	Polymodal, Poorly Sorted	Fine Skewed	Platykurtic	152.5	76.5	302.5	45.8463	54.1537	4.30108	4.77542	29.7671	0	0.975015	0	0	3.90006	76.7824	0	0	1.5844	15.5393	1.21877	0	0	1.09	0.37	2.94595	86.4542	13.5458	7.65	11	286	3	0.2	0.4	1.2	71	12.1	60	17.4	4.83	2.1
54-56 cm	54	1950	Muddy Sand	51.4154	4.13957	-0.265537	0.867022	Polymodal, Very Poorly Sorted	Fine Skewed	Platykurtic	152.5	76.5	605	53.8849	46.1151	7.49125	7.30913	31.1369	1.86441	0	0	0	0	76.2712	0	2.54237	0	18.2203	1.10169	0	1.18644	0.82	0.21	3.90476	88	11.9048	7.4	9	309	3	0.2	0.41	0.7	73	13.6	69	16.3	4.9	2.5
56-58 cm	56	1947.35	Muddy Sand	49.8952	4.10233	-0.249474	0.863074	Polymodal, Very Poorly Sorted	Fine Skewed	Platykurtic	152.5	76.5	605	53.2912	46.7088	6.39993	6.12453	31.241	0	1.81582	0	0	2.07523	72.6329	0	0	0.77821	18.2879	4.40986	0	0	1	0.281	3.55872	86.8	13.2	7.58	10	282	3	0.2	0.43	0.6	72	12.8	65	16.7	4.89	2.3
58-60 cm	58	1944.93	Muddy Sand	70.7976	4.38252	-0.45289	0.913267	Polymodal, Very Poorly Sorted	Very Fine Skewed	Mesokurtic	152.5	302.5	76.5	58.1227	41.8773	7.31981	8.80027	34.0673	1.70675	0	1.55159	0.853375	2.6377	77.5795	0	2.94802	0.698216	10.0078	2.01707	0	0	0.97	0.223	4.34978	87.0079	12.9921	7.43	8	289	2	0.2	0.4	0.9	70	12	62	16.1	4.83	2
60-62 cm	60	1942.51	Muddy Sand	52.3403	4.13179	-0.263029	0.889919	Polymodal, Very Poorly Sorted	Fine Skewed	Platykurtic	152.5	76.5	605	55.3246	44.6754	8.79182	6.74828	29.6718	2.49042	0	0	0	2.29885	73.7548	0	3.2567	0.574713	16.2835	1.341	0	0	0.98	0.23	4.26087	86	14.2857	7.37	9	307	2	0.2	0.37	1.5	71	11.1	60	15.3	4.82	2.1
62-64 cm	62	1940.1	Muddy Sand	74.345	4.42196	-0.424246	0.960333	Polymodal, Very Poorly Sorted	Very Fine Skewed	Mesokurtic	152.5	605	76.5	60.4975	39.5025	9.88138	7.89255	33.2196	0	1.80835	0	0	4.93187	66.5803	1.89687	7.02792	1.10967	16.6451	0	0	0	0.655	0.184	3.55978	92	8	7.13	10	292	2	0.2	0.39	1.4	75	12	62	16.1	4.78	2.3
64-66 cm	64	1937.68	Muddy Sand	47.945	4.13619	-0.216205	0.841858	Polymodal, Very Poorly Sorted	Fine Skewed	Platykurtic	152.5	76.5	302.5	51.2361	48.7639	6.04848	6.16987	30.178	3.1746	0	0	0	1.98413	69.4444	0	3.96825	1.45503	15.4762	4.49735	0	0	0.929	0.263	3.53232	86.9565	13.0435	7.59	14	322	3	0.2	0.4	0.4	90	13.9	64	14.8	4.97	2.4
66-68 cm	66	1935.27	Muddy Sand	61.7384	4.48446	-0.251682	0.893867	Polymodal, Very Poorly Sorted	Fine Skewed	Platykurtic	152.5	605	302.5	56.1655	43.8345	9.00119	7.2756	32.9234	0	0	0	0	2.60031	76.4796	0.882457	2.60031	0.764796	14.0722	2.60031	0	0	0.82	0.36	2.27778	88	11.7647	6.68	14	316	2	0.2	0.34	0.4	63	13.8	64	14.4	5.07	2.2
68-71 cm	68	1932.61	Muddy Sand	66.3346	4.25721	-0.198992	1.04643	Polymodal, Very Poorly Sorted	Fine Skewed	Mesokurtic	152.5	76.5	605	63.7049	36.2951	10.0691	6.76163	30.0616	2.45851	0	0	0	3.68777	55.3165	0	4.67117	1.22926	27.9656	4.67117	0	0	0.811	0.292	2.7774	91.6996	8.3004	7.08	15	311	3	0.2	0.34	0.2	66	12	62	14.1	5.14	2.2
71-73 cm	71	1929.95	Muddy Sand	53.4992	3.9674	-0.288498	0.928997	Polymodal, Poorly Sorted	Fine Skewed	Mesokurtic	152.5	76.5	605	58.2503	41.7497	6.37042	6.16805	32.1421	0	0	0	0	5.61122	80.1603	0	2.56513	0.480962	11.1824	0	0	0	0.886	0.279	3.17563	91.6667	8.33333	7.02	12	317	3	0.2	0.32	0.3	75	12.2	62	13.2	4.91	2.4
73-75 cm	73	1927.29	Muddy Sand	50.6002	3.97962	-0.259683	0.899435	Polymodal, Poorly Sorted	Fine Skewed	Platykurtic	152.5	76.5	605	55.8997	44.1003	5.41873	5.35803	29.2557	0	0	0	0	4.00844	71.73	0	4.21941	1.26582	18.7764	0	0	0	0.8	0.48	1.66667	92	8.26772	6.89	9	313	3	0.3	0.29	0.1	81	10.2	74	16.1	4.75	2.8
75-77 cm	75	1924.63	Muddy Sand	63.3867	3.56594	-0.257035	1.31609	Polymodal, Poorly Sorted	Fine Skewed	Leptokurtic	152.5	76.5	605	69.8583	30.1417	7.95247	7.05033	30.2703	1.05026	0	0	0	3.90098	75.0188	0	2.25056	1.27532	14.4036	2.10053	0	0	0.79	0.501	1.57685	87.2	12.8	6.31	20	251	3	0.2	0.23	0.1	82	10.1	74	10.9	5.13	3.2
77-79 cm	77	1921.98	Muddy Sand	59.9158	3.6673	-0.242003	1.20569	Polymodal, Poorly Sorted	Fine Skewed	Leptokurtic	76.5	152.5	605	67.5507	32.4493	7.72533	6.80096	26.1128	0	1.54664	0	0	5.7999	69.5988	0	0	2.17496	20.8797	0	0	0	0.778	1.09	0.713761	92.5197	7.48031	6.82	26	98	3	0.2	0.23	0.2	95	10.2	70	10.5	5.93	4
79-81 cm	79	1919.56	Muddy Sand	74.3669	4.09327	-0.13706	1.17901	Polymodal, Very Poorly Sorted	Fine Skewed	Leptokurtic	76.5	152.5	302.5	69.1799	30.8201	7.64338	16.9703	20.2485	3.20385	0	0	0	7.32308	68.6539	2.81657	0	3.50898	14.4936	0	0	0	0.66	1.21	0.545455	93	7.48031	7.17	19	104	2	0.2	0.22	0.1	110	9.7	63	10.2	5.6	4.9
81-83 cm	81	1917.14	Muddy Sand	59.034	3.81926	-0.289763	1.06588	Polymodal, Poorly Sorted	Fine Skewed	Mesokurtic	152.5	76.5	605	64.4869	35.5131	8.06325	7.56594	31.036	2.60957	1.1375	0	0	13.6501	63.2319	0	0	1.70626	17.6648	0	0	0	0.625	1.09	0.573394	95.2	4.8	8.71	9	244	2	0.2	0.16	0.01	80	9.3	75	10	4.67	4.4
83-85 cm	83	1914.73	Sandy Mud	43.7773	4.27876	-0.101886	0.838058	Polymodal, Very Poorly Sorted	Fine Skewed	Platykurtic	152.5	76.5	605	47.0016	52.9984	7.84059	6.29272	18.4829	2.07497	1.08689	0	0	2.66782	74.1061	0	3.11246	0.815167	13.9319	1.55623	0.648428	0	0.44	0.588	0.748299	96.8254	3.1746	9.83	7	197	2	0.3	0.13	0.01	70	9.2	74	8.8	4.67	4.9
85-87 cm	85	1912.31	Sandy Mud	44.2943	4.30443	-0.0981171	0.832178	Polymodal, Very Poorly Sorted	Symmetrical	Platykurtic	152.5	76.5	302.5	47.0609	52.9391	7.49171	8.25733	16.7084	0	0	1.84466	0	8.73786	74.7573	0	0	1.5534	13.1068	0	0	0	0.6	1.48	0.405405	92	7.6	8.97	5	141	2	0.4	0.1	0.01	102	9.6	62	10	3.85	7
87-89 cm	87	1909.9	Muddy Sand	63.2998	4.67111	-0.176006	0.884941	Polymodal, Very Poorly Sorted	Fine Skewed	Platykurtic	152.5	302.5	605	56.3364	43.6636	10.4168	10.5525	25.7686	2.2144	0	0	0	8.41472	64.9557	0.794913	0	1.91915	21.7011	0	0	0	0.503	2.04	0.246569	93.2271	6.77291	8.66	4	124	3	0.3	0.09	0.01	119	10.6	58	9.7	3.48	7.5
89-91 cm	89	1907.48	Muddy Sand	58.6374	4.6749	-0.129847	0.868276	Polymodal, Very Poorly Sorted	Fine Skewed	Platykurtic	152.5	76.5	302.5	53.9439	46.0561	9.54127	9.6062	21.9661	0	1.33556	0	0	5.34224	69.4491	0	0	2.00334	21.0351	0	0.834725	0	0.532	2.66	0.2	91.2698	8.73016	9.04	4	136	3	0.3	0.08	0.01	109	9.2	56	8.1	3.77	6.8
91-93 cm	91	1905.06	Muddy Sand	57.0053	4.75662	-0.103616	0.844323	Polymodal, Very Poorly Sorted	Fine Skewed	Platykurtic	152.5	76.5	302.5	51.7742	48.2258	9.56536	10.3352	19.5831	0	1.13879	0	0	3.27402	68.3274	0	0	2.13523	21.5658	3.55872	0	0.711744	0.68	2.48	0.274194	90	9.6	8.98	8	116	2	0.3	0.07	0.01	85	10.6	57	7.8	4.78	5.8
93-95 cm	93	1902.65	Sandy Mud	44.9406	4.80113	0.0692371	0.799253	Polymodal, Very Poorly Sorted	Symmetrical	Platykurtic	152.5	76.5	302.5	41.8886	58.1114	7.31739	9.13678	14.5648	2.46727	2.01037	0	0	3.83798	68.5353	0.738072	0	2.05606	20.355	0	0	0	0.378	1.79	0.211173	90.5138	9.48617	10.2	5	121	3	0.3	0.07	0.01	81	7.9	59	8.1	4.12	6.1
95-97 cm	95	1900.23	Sandy Mud	39.8661	4.38059	0.00952005	0.798163	Polymodal, Very Poorly Sorted	Symmetrical	Platykurtic	152.5	76.5	302.5	42.0286	57.9714	7.44934	7.5218	17.7627	0	1.57663	1.39114	0	2.50406	62.6014	0	0	2.78229	26.7099	0	2.4345	0	0.497	1.93	0.257513	91.6667	8.33333	10.19	7	104	2	0.3	0.07	0.01	78	9	57	9.2	4.43	5.6
97-99 cm	97	1897.81	Sandy Mud	38.2406	4.44509	0.0627757	0.796581	Polymodal, Very Poorly Sorted	Symmetrical	Platykurtic	152.5	76.5	302.5	39.3511	60.6489	7.64518	8.10916	13.7408	2.65879	1.89069	0	0	3.3678	62.0384	0	0.886263	1.77253	27.3855	0	0	0	0.6	2.57	0.233463	89	10.757	10.15	5	109	2	0.3	0.07	0.01	61	9.6	55	8.4	4.38	4.6
99-101 cm	99	1895.52	Muddy Sand	54.6616	3.76058	-0.217397	1.17994	Polymodal, Poorly Sorted	Fine Skewed	Leptokurtic	76.5	152.5	605	64.0428	35.9572	6.97452	6.72775	13.0739	0	0	1.71429	0	3.04762	73.3333	0	0	2.85714	17.5238	1.52381	0	0	0.46	2.35	0.195745	90.0794	9.92063	10.58	3	130	3	0.2	0.06	0.01	54	7.4	59	7.5	3.81	4.3
101-103 cm	101	1893.22	Sandy Mud	33.5876	4.45948	0.169465	0.774948	Polymodal, Very Poorly Sorted	Coarse Skewed	Platykurtic	152.5	302.5	605	31.7241	68.2759	6.19616	7.79491	12.5506	2.607	0.868998	0	0	7.29959	66.4784	0	0	4.17119	18.5748	0	0	0	0.646	1.76	0.367045	90.9449	9.05512	10.29	4	115	2	0.2	0.07	0.01	60	8.1	60	7.5	4.01	4.2
103-104 cm	103	1890.93	Sandy Mud	30.5732	4.35777	0.205971	0.987409	Polymodal, Very Poorly Sorted	Coarse Skewed	Mesokurtic	152.5	76.5	605	27.4342	72.5658	5.71298	5.3991	9.79966	0	0.856865	0	0	4.44012	73.6125	0	0	1.86952	16.6504	2.57059	0	0	1.25	3.64	0.343407	88	11.5538	9.59	6	116	2	0.3	0.07	0.01	72	11.5	57	9.3	5.04	4.8
104-106 cm	104	1888.63	Sandy Mud	30.4481	4.33447	0.201048	0.992525	Polymodal, Very Poorly Sorted	Coarse Skewed	Mesokurtic	152.5	76.5	605	27.6069	72.3931	5.67059	5.34944	9.07046	0	4.24516	0	0	1.27355	79.5967	0	0	2.54709	10.9843	1.35314	0	0	0.745	2.27	0.328194	93.254	6.74603	10.34	6	119	2	0.3	0.07	0.01	64	8.8	56	7.5	4.35	4.2
106-108 cm	106	1886.34	Sandy Mud	32.1509	4.41633	0.183671	0.959894	Polymodal, Very Poorly Sorted	Coarse Skewed	Mesokurtic	152.5	76.5	605	30.057	69.943	6.57528	6.04936	9.80064	0	4.11311	0	0	3.21337	67.4807	0	0	4.62725	17.3522	0	3.21337	0	0.625	1.73	0.361272	90.5138	9.48617	11.17	5	124	2	0.3	0.07	0.01	55	8.8	63	7.4	4.46	4.1
108-110 cm	108	1884.04	Sandy Mud	30.1927	4.33518	0.209756	0.992172	Polymodal, Very Poorly Sorted	Coarse Skewed	Mesokurtic	152.5	76.5	605	26.8272	73.1728	5.41609	4.6847	10.8361	0	0	0	0	3.50616	69.5187	0.55801	1.69263	3.38526	16.5031	0	4.83608	1.32992	0.55	2.52	0.218254	90	9.56175	11.33	5	131	2	0.3	0.08	0.01	53	8	60	8.2	4.53	4
110-112 cm	110	1881.75	Sandy Mud	30.6346	4.38274	0.216281	0.978063	Polymodal, Very Poorly Sorted	Coarse Skewed	Mesokurtic	152.5	302.5	605	26.7855	73.2145	5.36714	6.15461	10.639	0	2.27531	3.18544	0	7.05347	68.2594	0	0	3.86803	15.3584	0	0	0	0.577	2.21	0.261086	96.8127	3.18725	12.05	6	148	2	0.3	0.09	0.01	53	7.9	61	7.8	4.62	3.6
112-114 cm	112	1879.45	Sandy Mud	28.948	4.2593	0.217277	1.0312	Polymodal, Very Poorly Sorted	Coarse Skewed	Mesokurtic	152.5	76.5	605	25.1926	74.8074	5.03609	4.80169	8.31879	0	0	2.184	0.764401	6.11521	72.0721	0	0	1.2012	15.0696	0	2.5935	0	0.451	1.46	0.308904	95.2381	4.7619	12.04	4	205	2	0.3	0.08	0.01	66	7.5	63	7.7	4.55	4.5
114-116 cm	114	1877.16	Sandy Mud	28.0502	4.21683	0.224044	1.0505	Polymodal, Very Poorly Sorted	Coarse Skewed	Mesokurtic	152.5	76.5	605	23.9677	76.0323	5.12381	4.08745	7.61259	0	2.76743	0	0	1.59659	78.2331	0	0	1.59659	15.8063	0	0	0	0.47	1.33	0.353383	93	7.14286	12.16	4	193	2	0.3	0.07	0.01	55	7.8	68	7.4	4.19	4
116-118 cm	116	1874.86	Sandy Mud	24.384	3.63622	0.146195	0.984666	Polymodal, Poorly Sorted	Coarse Skewed	Mesokurtic	76.5	152.5	605	22.7393	77.2607	4.83028	4.01116	6.89057	2.29885	3.06513	2.60536	0	2.29885	76.6284	0	0	0.842912	10.3448	1.91571	0	0	0.408	1.21	0.33719	93.6508	6.34921	12.43	4	190	2	0.3	0.07	0.01	54	7.6	65	7.4	4.16	4
118-120 cm	118	1872.44	Sandy Mud	24.5896	3.64687	0.142451	0.980441	Polymodal, Poorly Sorted	Coarse Skewed	Mesokurtic	76.5	152.5	605	23.2498	76.7502	4.96038	3.87754	7.07101	0	0	3.31767	0	0	77.4122	0	0	1.65883	16.0907	0	1.5206	0	0.394	0.943	0.417815	92.4303	7.56972	11.95	4	173	2	0.3	0.07	0.01	48	7.9	68	8	4.05	4.3
120-122 cm	120	1870.03	Sandy Mud	28.3417	4.27256	0.227223	1.05871	Polymodal, Very Poorly Sorted	Coarse Skewed	Mesokurtic	76.5	152.5	605	24.324	75.676	6.20408	3.97996	6.94181	2.74262	0	3.37553	0	1.47679	77.5316	0	0	1.26582	13.6076	0	0	0	0.37	1.07	0.345794	93	7.48031	12.28	4	198	2	0.3	0.07	0.01	53	7.5	65	7.6	4.1	4.4
122-124 cm	122	1867.61	Sandy Mud	24.0731	3.59997	0.14479	0.983296	Polymodal, Poorly Sorted	Coarse Skewed	Mesokurtic	76.5	152.5	605	22.2606	77.7394	4.46291	3.88466	6.92731	4.2796	0	5.13552	0	6.84736	62.7675	0	0	1.71184	19.2582	0	0	0	0.333	0.664	0.501506	100	0	11.08	3	188	2	0.3	0.06	0.01	39	7.2	60	7.8	3.71	3.6
124-126 cm	124	1865.2	Sandy Mud	24.2948	3.60103	0.143935	0.973624	Polymodal, Poorly Sorted	Coarse Skewed	Mesokurtic	152.5	76.5	605	22.4348	77.5652	4.10504	3.88974	7.71732	0	1.11075	2.94022	0	3.52826	78.8958	0	0	0	13.525	0	0	0	0.363	0.73	0.49726	100	0	11.83	3	199	3	0.3	0.06	0.01	49	7.4	64	7.6	3.85	4.2
126-128 cm	126	1862.78	Sandy Mud	22.8572	3.51148	0.150086	1.00158	Polymodal, Poorly Sorted	Coarse Skewed	Mesokurtic	76.5	152.5	605	20.0994	79.9006	4.11641	3.38024	6.25129	0	0	0	0	0	81.3953	0	0	0.715564	16.1002	1.78891	0	0	0.33	0.63	0.52381	89	11.1111	12.36	3	214	2	0.3	0.06	0.01	55	7.7	67	7.8	3.91	4.6
128-130 cm	128	1860.36	Sandy Mud	23.0087	3.52229	0.155873	0.998312	Polymodal, Poorly Sorted	Coarse Skewed	Mesokurtic	152.5	76.5	605	19.8546	80.1454	3.88649	3.282	7.33358	4.39078	0	7.9034	0	3.51262	48.2986	0	0	3.9517	31.9429	0	0	0	0.422	0.538	0.784387	100	0	12.54	3	194	2	0.3	0.06	0.01	51	7.5	66	8.2	3.9	4.3
130-132.5 cm	130	1857.95	Sandy Mud	22.4417	3.48305	0.158483	1.00875	Polymodal, Poorly Sorted	Coarse Skewed	Mesokurtic	152.5	76.5	605	18.8074	81.1926	3.90584	2.90546	7.30466	3.91489	0	3.57447	0	0.851064	74.0426	0	0	0.595745	14.6383	2.38298	0	0	0.47	0.72	0.652778	92	7.50988	11.62	5	208	3	0.3	0.07	0.01	49	8.4	67	8.3	4	4.6
Maximum		….	…..	74.3669	4.80113	0.227223	1.31609	…..	…..	…..	152.5	605	605	69.8583	81.1926	10.4168	16.9703	34.0673	4.39078	4.24516	7.9034	0.853375	16.4534	87.3521	2.81657	11.3916	7.13306	31.9429	4.67117	4.83608	1.35005	1.8	3.64	4.34978	100	16.3347	12.54	26	322	3	0.4	0.65	4.7	119	13.9	87	23.3	5.93	7.5
Minimum		….	…..	22.4417	3.10094	-0.45289	0.708008	…..	…..	…..	76.5	76.5	76.5	18.8074	30.1417	0.312695	1.07091	6.25129	0	0	0	0	0	48.2986	0	0	0	7.98845	0	0	0	0.33	0.184	0.195745	83.6653	0	6.31	3	98	2	0.2	0.06	0.01	39	7.2	55	7.4	3.48	2
Mean		….	…..	40.2334	3.94876	-0.0441655	0.898198	…..	…..	…..	130.967	130.717	505.277	40.4044	59.5956	5.37762	5.23445	17.7835	1.08731	0.77937	0.691304	0.0269629	3.65379	72.1925	0.192371	1.49848	1.9413	16.8183	0.850283	0.26802	0.0884903	0.9123	1.13088	1.38175	89.7444	10.244	8.96767	9.5	207.567	2.51667	0.273333	0.253667	1.35767	73.3167	10.3617	64.5667	14.03	4.59433	3.475
Standard Deviation		….	…..	14.8077	0.469643	0.178977	0.132085	…..	…..	…..	34.5359	107.731	160.793	15.0142	15.0142	2.87605	2.96996	8.79005	1.40837	1.17489	1.48841	0.14787	3.2627	7.49648	0.574991	2.50923	1.20811	4.83942	1.34219	0.884861	0.309685	0.452649	0.76045	1.19266	4.15864	4.16726	1.84368	4.95231	72.0286	0.503939	0.0516398	0.172036	1.74204	16.1418	1.92081	5.55822	5.93848	0.46587	1.40708
Grain size analysed according to:
*Folk, R.L., Ward, W.C., 1957. Brazos River bar: a study in the significance of grain size parameters. Journal of Sedimentary Petrology, 27 (1), 3-26.
[truncated: 32 more columns]
