# Supplementary material for: Unraveling Anthropocene Paleoenvironmental Conditions Combining Sediment and Foraminiferal Data: Proof-of-Concept in the Sepetiba Bay (SE, Brazil)
Source: Frontiers journal article supplement (doi:10.3389/fevo.2022.852439), 2022-03-28
Supplement: Table_3.xlsx [file Table_3.xlsx]

## Sheet: EF, PERI, Igeo, CF
Table S3. Enrichment factor (EF) values for the analyzed chemical elements along the SP5 core. Values of the potential ecological hazard index (PERI), as well as Igeo and CF values are also presente
Interval	Level	Age	EF	EF	EF	EF	EF	EF	EF	EF	EF	EF	EF	EF	EF	EF	EF	EF	EF	EF	EF	PERI	Igeo	Igeo	Igeo	Igeo	Igeo	Igeo	Igeo	Igeo	Igeo	Igeo	Igeo	Igeo	Igeo	Igeo	Igeo	Igeo	Igeo	Igeo	Igeo	Igeo	CF	CF	CF	CF	CF	CF	CF
cm	cm	Year	Al	As	Cd	Ce	Fe	Hf	Mg	Mn	Mo	Nb	P	Pb	S	Sn	Th	U	W	Zn	Zr		Sc	Al	As	Cd	Ce	Fe	Hf	Mg	Mn	Mo	Nb	P	Pb	S	Sn	Th	U	W	Zn	Zr	Sc	Al	As	Cd	Ce	Fe	Hf
0-3 cm	0	2015	0.842136	0.706767	6.46964	1.27151	0.874793	0.774725	0.777198	0.942734	0.687516	0.915584	1.17021	1.51342	0.797878	1.74029	0.896121	1.07484	0.803419	9.07003	0.830889	242.889	-0.439112	-0.686987	-0.939805	2.25457	-0.0925661	-0.632098	-0.807355	-0.771731	-0.524189	-0.979647	-0.566347	-0.212339	0.158698	-0.764872	0.360213	-0.597346	-0.334984	-0.754888	2.742	-0.706383	1.10638	0.931724	0.781955	7.15789	1.40678	0.967856	0.857143
03-09 cm	3	2011.38	1.0119	0.83527	7.42105	1.46649	1.01871	1.03003	0.881169	1.1389	0.728465	1.02102	1.29761	1.75325	1.00188	2.08567	0.949495	1.41462	0.890152	10.7451	1.01932	236.459	-0.68012	-0.663049	-0.939805	2.2115	-0.127756	-0.653381	-0.63743	-0.831602	-0.49248	-1.13719	-0.650115	-0.304261	0.129915	-0.677409	0.380391	-0.754888	-0.179706	-0.847997	2.74548	-0.652517	0.93617	0.947313	0.781955	6.94737	1.37288	0.953683	0.964286
09-11 cm	9	2004.13	0.952982	0.83527	7.64593	1.62943	0.990589	1.10633	0.866234	1.09433	0.952608	1.20968	1.34883	1.92107	1.00188	2.49122	1.05905	1.35688	0.890152	10.3687	1.07002	243.588	-0.68012	-0.749599	-0.939805	2.25457	0.0242475	-0.693761	-0.534336	-0.856265	-0.550068	-0.750165	-0.405493	-0.248408	0.261791	-0.677409	0.636731	-0.597346	-0.239827	-0.847997	2.69405	-0.582487	0.93617	0.892153	0.781955	7.15789	1.52542	0.92736	1.03571
11-13 cm	11	2001.71	0.914662	0.765664	7.21491	1.34428	0.90804	0.909226	0.759821	0.969096	0.744809	0.844372	0.986014	1.58286	0.918391	1.88531	1.09131	1.27027	0.652778	9.95672	0.94905	249.049	-0.554589	-0.683278	-0.939805	2.29639	-0.127756	-0.693761	-0.691878	-0.91983	-0.599878	-0.979647	-0.798638	-0.574909	0.107944	-0.677409	0.360213	-0.428527	-0.209453	-1.16993	2.76108	-0.630033	1.02128	0.934123	0.781955	7.36842	1.37288	0.92736	0.928571
14-17 cm	14	2001	0.97988	0.899522	8.54545	1.28544	1.01871	0.877435	0.911039	1.02996	0.868554	1.04876	1.21224	1.89016	1.00188	2.46225	0.883761	1.41462	0.890152	11.939	0.947271	270.751	-0.68012	-0.709442	-0.83289	2.41504	-0.317858	-0.653381	-0.868755	-0.783508	-0.637531	-0.883432	-0.611435	-0.402442	0.238387	-0.677409	0.619857	-0.858392	-0.179706	-0.847997	2.89749	-0.75827	0.93617	0.917335	0.842105	8	1.20339	0.953683	0.821429
17-19 cm	17	2000	1.02215	0.899522	10.5694	1.44838	1.05764	0.991883	0.911039	1.06462	0.980626	1.06541	1.19517	1.92549	1.11975	2.34638	1.02984	1.38575	0.830808	13.8466	0.985963	329.435	-0.68012	-0.648513	-0.83289	2.7217	-0.145677	-0.599274	-0.691878	-0.783508	-0.589777	-0.708345	-0.588715	-0.422906	0.265104	-0.516944	0.550316	-0.637704	-0.209453	-0.947533	3.11134	-0.700515	0.93617	0.956906	0.842105	9.89474	1.35593	0.990129	0.928571
19-22 cm	19	1998	0.846471	0.761134	8.75304	1.1796	0.883944	0.807005	0.770879	0.909214	0.948298	0.901499	1.0113	1.70026	0.897613	2.03442	0.815779	1.19699	0.803419	11.5956	0.878304	323.433	-0.439112	-0.679579	-0.83289	2.69067	-0.200819	-0.617085	-0.748461	-0.783508	-0.576419	-0.5157	-0.588715	-0.422906	0.326642	-0.594947	0.585506	-0.732861	-0.179706	-0.754888	3.09639	-0.626319	1.10638	0.936521	0.842105	9.68421	1.30508	0.97798	0.892857
22-24 cm	22	1991	0.894701	0.824561	9.27632	1.37747	0.913988	0.804315	0.8625	0.860157	1.64372	0.95119	1.04862	2.54634	0.864368	2.8678	0.990883	1.34966	0.761574	11.408	0.827973	320.214	-0.554589	-0.715111	-0.83289	2.65896	-0.0925661	-0.684342	-0.868755	-0.736966	-0.771916	0.162372	-0.626783	-0.4861	0.793836	-0.764872	0.965354	-0.567802	-0.121991	-0.947533	2.95738	-0.826933	1.02128	0.913738	0.842105	9.47368	1.40678	0.933435	0.821429
24-26.5 cm	24	1989	0.904998	0.761134	8.18219	1.30215	0.882114	0.742445	0.821429	0.814941	0.782346	0.793506	1.0113	1.58442	0.797878	2.05893	1.00736	1.14813	0.652778	10.7062	0.848952	302.888	-0.439112	-0.583126	-0.83289	2.59337	-0.0582146	-0.620075	-0.868755	-0.691878	-0.734344	-0.793234	-0.772798	-0.422906	0.22484	-0.764872	0.602784	-0.428527	-0.239827	-1.05445	2.98126	-0.675357	1.10638	1.00127	0.842105	9.05263	1.44068	0.975955	0.821429
26.5-29 cm	26.5	1982.99	0.970914	0.83527	8.77033	1.24923	1.01438	0.839286	0.963312	0.906167	0.840537	0.982172	1.21224	1.79742	0.884013	2.37535	0.898368	1.27027	0.830808	12.0039	0.941935	276.01	-0.68012	-0.722704	-0.939805	2.45251	-0.359081	-0.659521	-0.932886	-0.703018	-0.82227	-0.930737	-0.706072	-0.402442	0.165805	-0.857981	0.568018	-0.834741	-0.334984	-0.947533	2.90531	-0.766421	0.93617	0.908941	0.781955	8.21053	1.16949	0.949633	0.785714
29-32 cm	29	1979.97	1.04521	0.899522	10.1196	1.53891	1.06196	0.877435	0.978247	0.930926	0.728465	1.0876	1.24639	1.97848	0.884013	2.46225	0.993318	1.32801	0.830808	12.0947	0.844539	315.52	-0.68012	-0.616333	-0.83289	2.65896	-0.0582146	-0.593385	-0.868755	-0.680823	-0.783381	-1.13719	-0.558967	-0.362364	0.304275	-0.857981	0.619857	-0.689792	-0.270854	-0.947533	2.91618	-0.923884	0.93617	0.978491	0.842105	9.47368	1.44068	0.994179	0.821429
32-34 cm	32	1976.94	0.978066	0.824561	8.65789	1.32768	0.955623	0.699405	0.889881	0.851079	0.719126	0.956277	1.09557	1.70835	0.810345	2.15085	0.897151	1.21734	0.761574	10.611	0.854879	295.441	-0.554589	-0.586585	-0.83289	2.55943	-0.145677	-0.620075	-1.07039	-0.691878	-0.787223	-1.03027	-0.619088	-0.422906	0.218019	-0.857981	0.550316	-0.711166	-0.270854	-0.947533	2.8529	-0.780797	1.02128	0.998876	0.842105	8.84211	1.35593	0.975955	0.714286
34-36 cm	34	1973.92	0.938145	0.765664	8.65789	1.32768	0.957606	0.699405	0.930952	0.805688	0.59071	0.905411	1.14252	1.72455	0.702299	2.12429	0.85698	1.11149	0.652778	10.0995	0.837757	294.373	-0.554589	-0.646706	-0.939805	2.55943	-0.145677	-0.617085	-1.07039	-0.626783	-0.866295	-1.31407	-0.697944	-0.362364	0.231629	-1.06443	0.532394	-0.777255	-0.402098	-1.16993	2.78162	-0.809985	1.02128	0.958105	0.781955	8.84211	1.35593	0.97798	0.714286
36-39 cm	36	1970.9	0.922881	0.824561	8.45175	1.41066	0.961571	0.804315	0.883036	0.79661	0.539344	0.930844	1.25208	1.75289	0.702299	2.09774	0.970798	1.19088	0.652778	9.4452	0.913583	288.108	-0.554589	-0.670372	-0.83289	2.52466	-0.0582146	-0.611124	-0.868755	-0.703018	-0.882643	-1.44531	-0.657977	-0.230261	0.255143	-1.06443	0.514247	-0.597346	-0.302563	-1.16993	2.68499	-0.684981	1.02128	0.942517	0.842105	8.63158	1.44068	0.98203	0.821429
39-41 cm	39	1967.88	0.911501	0.706767	6.8502	1.40939	0.894924	0.710165	0.846703	0.731143	0.426734	0.887413	1.12687	1.62178	0.598408	2.08344	0.896121	1.07484	0.702991	8.22452	0.754122	255.564	-0.439112	-0.572796	-0.939805	2.33703	0.0559564	-0.599274	-0.932886	-0.648156	-0.890887	-1.6677	-0.611435	-0.266787	0.258471	-1.17991	0.619857	-0.597346	-0.334984	-0.947533	2.60082	-0.846241	1.10638	1.00847	0.781955	7.57895	1.55932	0.990129	0.785714
41-43 cm	41	1965.47	0.990128	0.771018	8.32057	1.35786	1.01871	0.762987	0.955844	0.831891	0.448286	1.00437	1.24639	1.86366	0.589342	2.37535	0.92028	1.21253	0.830808	8.87637	0.864552	260.159	-0.68012	-0.694433	-1.05528	2.37656	-0.238787	-0.653381	-1.07039	-0.714246	-0.945653	-1.83763	-0.673831	-0.362364	0.218019	-1.44294	0.568018	-0.799975	-0.402098	-0.947533	2.46985	-0.890095	0.93617	0.926928	0.721805	7.78947	1.27119	0.953683	0.714286
43-45 cm	43	1963.05	0.870315	0.6524	6.8502	1.1796	0.904075	0.774725	0.853022	0.724858	0.355612	0.896803	1.12687	1.69652	0.448806	2.03442	0.83432	1.07484	0.753205	7.01665	0.803795	253.985	-0.439112	-0.639502	-1.05528	2.33703	-0.200819	-0.584597	-0.807355	-0.63743	-0.903342	-1.93074	-0.596248	-0.266787	0.323468	-1.59495	0.585506	-0.70044	-0.334984	-0.847997	2.37167	-0.754212	1.10638	0.962902	0.721805	7.57895	1.30508	1.00025	0.857143
45-47 cm	45	1960.64	0.847555	0.598034	4.94737	1.103	0.894924	0.742445	0.840385	0.708098	0.284489	0.845155	1.11243	1.43868	0.398939	1.71578	0.760158	1.09927	0.652778	5.36955	0.808311	186.625	-0.439112	-0.677733	-1.18081	1.86755	-0.297681	-0.599274	-0.868755	-0.658963	-0.937091	-2.25267	-0.681824	-0.285402	0.0856343	-1.76487	0.339749	-0.834741	-0.302563	-1.05445	1.98569	-0.74613	1.10638	0.93772	0.661654	5.47368	1.22034	0.990129	0.821429
47-49 cm	47	1957.98	0.890005	0.64787	3.71053	1.17832	0.957606	0.769345	0.910417	0.760297	0.33388	0.910498	1.14252	1.42498	0.378161	1.67288	0.769943	1.13795	0.707176	4.7345	0.810851	134.121	-0.554589	-0.722704	-1.18081	1.33703	-0.317858	-0.617085	-0.932886	-0.658963	-0.949953	-2.13719	-0.689861	-0.362364	-0.0436487	-1.95752	0.187746	-0.931765	-0.368151	-1.05445	1.68862	-0.85708	1.02128	0.908941	0.661654	3.78947	1.20339	0.97798	0.785714
49-52 cm	49	1955.32	0.842136	0.4893	2.66397	1.11832	0.887604	0.710165	0.846703	0.722763	0.260782	0.788811	0.953508	1.24063	0.299204	1.37262	0.772518	1.07484	0.652778	3.49185	0.812827	106.08	-0.439112	-0.686987	-1.47032	0.974465	-0.277781	-0.611124	-0.932886	-0.648156	-0.907518	-2.3782	-0.78136	-0.507795	-0.128041	-2.17991	0.0178213	-0.811471	-0.334984	-1.05445	1.36488	-0.738092	1.10638	0.931724	0.541353	2.94737	1.23729	0.98203	0.785714
52-54 cm	52	1952.66	0.898224	0.64787	2.47368	1.17832	0.957606	0.734375	0.930952	0.789802	0.231148	0.854545	1.07992	1.27115	0.324138	1.46045	0.810114	1.19088	0.652778	3.10478	0.884231	93.5593	-0.554589	-0.709442	-1.18081	0.752072	-0.317858	-0.617085	-1	-0.626783	-0.895027	-2.6677	-0.78136	-0.443664	-0.20846	-2.17991	-0.00817393	-0.858392	-0.302563	-1.16993	1.0799	-0.732094	1.02128	0.917335	0.661654	2.52632	1.20339	0.97798	0.75
54-56 cm	54	1950	0.802034	0.4893	1.33198	1.11832	0.896754	0.807005	0.884615	0.756282	0.213367	0.793506	1.06908	1.13973	0.249337	0.980443	0.797239	1.1237	0.55235	2.03142	0.887336	59.2612	-0.439112	-0.757376	-1.47032	-0.0255351	-0.277781	-0.596327	-0.748461	-0.584963	-0.842115	-2.6677	-0.772798	-0.342735	-0.250415	-2.44294	-0.467606	-0.766028	-0.270854	-1.29546	0.583379	-0.61156	1.10638	0.887357	0.541353	1.47368	1.23729	0.992154	0.892857
56-58 cm	56	1947.35	0.890005	0.588972	1.23684	1.19492	0.969501	0.804315	0.978869	0.835192	0.256831	0.844372	1.17383	1.10922	0.270115	1.16836	0.749858	1.11149	0.652778	2.03417	0.868332	52.8445	-0.554589	-0.722704	-1.31832	-0.247928	-0.297681	-0.599274	-0.868755	-0.554374	-0.814408	-2.5157	-0.798638	-0.32337	-0.405048	-2.44294	-0.330102	-0.9699	-0.402098	-1.16993	0.46985	-0.75827	1.02128	0.908941	0.601504	1.26316	1.22034	0.990129	0.821429
58-60 cm	58	1944.93	0.872393	0.471178	1.85526	1.16172	0.957606	0.699405	0.965179	0.810227	0.256831	0.808766	1.11122	1.18208	0.270115	1.16836	0.816809	1.08502	0.652778	2.75981	0.929482	71.7021	-0.554589	-0.75154	-1.64024	0.337035	-0.338323	-0.617085	-1.07039	-0.574694	-0.85819	-2.5157	-0.860794	-0.402442	-0.313256	-2.44294	-0.330102	-0.846518	-0.436864	-1.16993	0.909979	-0.66009	1.02128	0.890954	0.481203	1.89474	1.18644	0.97798	0.714286
60-62 cm	60	1942.51	0.944016	0.578264	3.37321	1.28544	1.0425	0.801136	1.02305	0.85665	0.280179	0.910035	1.29761	1.34696	0.294671	1.36148	0.861849	1.12592	0.652778	3.82826	0.920588	111.314	-0.68012	-0.763237	-1.47032	1.074	-0.317858	-0.620075	-1	-0.616213	-0.903342	-2.5157	-0.816125	-0.304261	-0.250415	-2.44294	-0.234945	-0.894612	-0.509014	-1.29546	1.25657	-0.799493	0.93617	0.883759	0.541353	3.15789	1.20339	0.975955	0.75
62-64 cm	62	1940.1	0.913274	0.642515	3.14833	1.35786	1.03385	0.877435	1.02305	0.846746	0.280179	0.871192	1.29761	1.3867	0.294671	1.33251	0.847242	1.29914	0.712121	3.47788	1.01398	105.43	-0.68012	-0.811	-1.31832	0.974465	-0.238787	-0.632098	-0.868755	-0.616213	-0.920118	-2.5157	-0.879056	-0.304261	-0.20846	-2.44294	-0.265972	-0.919274	-0.302563	-1.16993	1.11809	-0.66009	0.93617	0.85498	0.601504	2.94737	1.27119	0.967856	0.821429
64-66 cm	64	1937.68	0.891179	0.824561	0.824561	1.49364	0.985362	0.839286	0.99256	0.79888	0.231148	0.808766	1.22078	1.29543	0.324138	1.27458	0.897151	1.48198	0.707176	2.12933	1.07502	43.7755	-0.554589	-0.720802	-0.83289	-0.83289	0.0242475	-0.575863	-0.807355	-0.534336	-0.878539	-2.6677	-0.860794	-0.266787	-0.181152	-2.17991	-0.204571	-0.711166	0.0129391	-1.05445	0.535814	-0.450226	1.02128	0.91014	0.842105	0.842105	1.52542	1.00633	0.857143
66-68 cm	66	1935.27	0.855634	0.899522	0.899522	1.1406	1.09657	0.839286	1.10519	0.869029	0.280179	0.887839	1.29761	1.2233	0.412539	1.0718	0.7669	1.58784	0.712121	1.79085	1.08336	42.0902	-0.68012	-0.905054	-0.83289	-0.83289	-0.490326	-0.547123	-0.932886	-0.504792	-0.882643	-2.5157	-0.851749	-0.304261	-0.389338	-1.95752	-0.58008	-1.06301	-0.0130562	-1.16993	0.160522	-0.564609	0.93617	0.801019	0.842105	0.842105	1.0678	1.02658	0.785714
68-71 cm	68	1932.61	0.831297	0.883459	0.412281	1.09534	1.01907	0.769345	1.02679	0.794341	0.33388	0.78842	1.07992	1.01206	0.378161	0.716949	0.756553	1.3232	0.652778	1.28474	0.957611	28.8664	-0.554589	-0.821152	-0.733354	-1.83289	-0.423211	-0.52734	-0.932886	-0.485427	-0.886759	-2.13719	-0.897553	-0.443664	-0.537296	-1.95752	-1.03465	-0.957076	-0.15056	-1.16993	-0.193115	-0.617077	1.02128	0.848984	0.902256	0.421053	1.11864	1.04075	0.785714
71-73 cm	71	1929.95	0.824252	0.706767	0.618421	1.2447	0.973467	0.839286	1.00625	0.74895	0.231148	0.732468	1.03297	0.971576	0.324138	0.79661	0.776638	1.27027	0.707176	1.20147	1.03955	33.1672	-0.554589	-0.833431	-1.05528	-1.24793	-0.238787	-0.593385	-0.807355	-0.514573	-0.971648	-2.6677	-1.00375	-0.507795	-0.59619	-2.17991	-0.882643	-0.919274	-0.209453	-1.05445	-0.289791	-0.498626	1.02128	0.84179	0.721805	0.631579	1.27119	0.994179	0.857143
73-75 cm	73	1927.29	0.970786	0.63609	0.247368	1.61314	1.13009	1.175	1.13357	0.91508	0.369836	0.921688	1.25834	1.21447	0.324138	1.17898	1.14889	1.61959	0.783333	1.31329	1.28415	19.0184	-0.817623	-0.860398	-1.47032	-2.83289	-0.127756	-0.641181	-0.584963	-0.605721	-0.945653	-2.25267	-0.935272	-0.4861	-0.537296	-2.44294	-0.58008	-0.617384	-0.121991	-1.16993	-0.42444	-0.456806	0.851064	0.826201	0.541353	0.210526	1.37288	0.961782	1
75-77 cm	75	1924.63	0.889065	1.41353	0.247368	1.63305	1.2205	1.34286	1.08429	0.887846	1.29443	1.01325	1.14565	1.18047	0.713103	1.08339	1.17299	2.1277	0.783333	1.28474	1.41917	25.3845	-0.817623	-0.987262	-0.318317	-2.83289	-0.110054	-0.53015	-0.392317	-0.669851	-0.989242	-0.445311	-0.798638	-0.621451	-0.578268	-1.30544	-0.702071	-0.587431	0.271673	-1.16993	-0.456149	-0.312573	0.851064	0.756651	1.20301	0.210526	1.38983	1.03872	1.14286
77-79 cm	77	1921.98	1.06769	2.04177	0.549708	2.10217	1.56759	1.86508	1.18651	1.06517	2.77377	1.26147	1.27295	1.43577	1.44061	1.27458	1.49972	3.10511	0.87037	1.49093	2.0628	35.8876	-0.969626	-0.87513	0.0601948	-1.83289	0.10225	-0.321076	-0.0703893	-0.691878	-0.878539	0.502222	-0.634518	-0.621451	-0.447798	-0.442943	-0.619609	-0.384938	0.665016	-1.16993	-0.393413	0.0749763	0.765957	0.817807	1.56391	0.421053	1.61017	1.20071	1.42857
79-81 cm	79	1919.56	1.12249	1.49206	0.274854	2.43409	1.48036	2.28472	1.00397	1.13477	2.97923	1.43102	1.12687	1.53833	1.6567	1.38079	1.76752	2.96396	0.87037	1.31646	2.49656	25.7018	-0.969626	-0.802929	-0.392317	-2.83289	0.313754	-0.403682	0.222392	-0.932886	-0.787223	0.605316	-0.452578	-0.797301	-0.348262	-0.24131	-0.504131	-0.147899	0.597902	-1.16993	-0.572963	0.350313	0.765957	0.859777	1.14286	0.210526	1.86441	1.13389	1.75
81-83 cm	81	1917.14	1.22722	0.63609	0.0742105	1.59322	1.11106	1.84643	0.657143	0.727162	0.95541	1.77013	1.07053	1.4768	0.777931	1.52949	1.43009	2.38176	1.10972	1.09916	2.11922	15.8297	-0.817623	-0.522229	-1.47032	-4.56986	-0.145677	-0.665686	0.0671142	-1.39232	-1.27727	-0.883432	0.00623195	-0.719299	-0.255153	-1.17991	-0.204571	-0.301522	0.434403	-0.667425	-0.681216	0.26591	0.851064	1.04444	0.541353	0.0631579	1.35593	0.945583	1.57143
83-85 cm	83	1914.73	1.53892	0.549708	0.0824561	1.54896	1.23451	2.28472	0.556746	0.659681	1.19854	2.33304	1.21035	1.64628	0.864368	2.01808	1.6604	2.29354	1.37809	1.12613	2.50634	14.8185	-0.969626	-0.34771	-1.83289	-4.56986	-0.338323	-0.665686	0.222392	-1.78351	-1.56979	-0.708345	0.252588	-0.694208	-0.250415	-1.17991	0.0433564	-0.238097	0.227952	-0.50696	-0.798255	0.355956	0.765957	1.17875	0.421053	0.0631579	1.18644	0.945583	1.75
85-87 cm	85	1912.31	1.57982	0.441729	0.0927632	2.53919	1.14496	3.67188	0.410714	1.71578	1.54098	3.58604	1.00949	2.67791	1.37759	2.70847	2.36004	3.21537	1.87674	1.15983	4.25972	16.6523	-1.13955	-0.479794	-2.31832	-4.56986	0.20482	-0.94425	0.736966	-2.39232	-0.36069	-0.5157	0.70284	-1.12592	0.281554	-0.677409	0.297929	0.0992616	0.545434	-0.231326	-0.925634	0.951207	0.680851	1.07562	0.300752	0.0631579	1.72881	0.779549	2.5
87-89 cm	87	1909.9	1.52522	0.353383	0.0927632	2.96239	1.03493	3.93415	0.390179	2.29451	1.42541	3.65471	0.892108	2.75078	1.53966	2.46949	2.78184	3.25507	1.95833	1.21336	4.33677	16.1726	-1.13955	-0.530535	-2.64024	-4.56986	0.427212	-1.09002	0.836501	-2.46632	0.0586345	-0.628175	0.730205	-1.30426	0.320287	-0.516944	0.164663	0.336487	0.563136	-0.169925	-0.860539	0.977069	0.680851	1.03845	0.240602	0.0631579	2.01695	0.704632	2.67857
89-91 cm	89	1907.48	1.8196	0.403867	0.106015	3.10109	1.28134	4.07653	0.445918	2.93355	2.15738	3.90649	0.992722	2.94249	2.31527	2.77676	2.96117	3.67471	2.2381	1.32552	4.58731	15.5095	-1.3322	-0.468579	-2.64024	-4.56986	0.300579	-0.974544	0.695145	-2.46632	0.22045	-0.222918	0.633678	-1.34274	0.22484	-0.121015	0.141204	0.233972	0.545434	-0.169925	-0.925634	0.865452	0.595745	1.08401	0.240602	0.0631579	1.84746	0.763351	2.42857
91-93 cm	91	1905.06	1.80752	0.807734	0.106015	2.41828	1.62462	3.47704	0.445918	2.80905	3.08197	3.49666	0.965891	2.65102	3.33399	2.64019	2.42173	3.26641	1.86508	1.24395	4.1009	16.9174	-1.3322	-0.478186	-1.64024	-4.56986	-0.0582146	-0.632098	0.465664	-2.46632	0.157885	0.291655	0.473781	-1.38226	0.0743485	0.405053	0.0684474	-0.0561561	0.375509	-0.432959	-1.01726	0.703745	0.595745	1.07682	0.481203	0.0631579	1.44068	0.967856	2.07143
93-95 cm	93	1902.65	1.79645	0.441729	0.0927632	2.01642	1.22526	3.19978	0.349107	3.3873	1.42541	3.6013	0.821678	2.40465	2.43103	2.58898	2.24957	2.81841	1.95833	1.01708	3.79009	15.5435	-1.13955	-0.294405	-2.31832	-4.56986	-0.127756	-0.846464	0.53842	-2.62678	0.620582	-0.628175	0.708966	-1.42291	0.126276	0.142019	0.232834	0.0300996	0.355331	-0.169925	-1.11511	0.782679	0.680851	1.22311	0.300752	0.0631579	1.37288	0.834219	2.17857
95-97 cm	95	1900.23	1.79469	0.618421	0.0927632	1.94174	1.31745	2.9375	0.390179	3.39751	1.73361	3.04432	0.868631	2.14354	2.5931	2.46949	2.01859	2.50084	1.79514	1.19552	3.32596	15.8977	-1.13955	-0.29582	-1.83289	-4.56986	-0.182203	-0.741802	0.415037	-2.46632	0.624926	-0.345775	0.466568	-1.34274	-0.039556	0.235128	0.164663	-0.126204	0.182864	-0.295456	-0.881913	0.594218	0.680851	1.22191	0.421053	0.0631579	1.32203	0.896988	2
97-99 cm	97	1897.81	1.78764	0.441729	0.0927632	1.51854	1.30258	2.41295	0.359375	3.04346	1.42541	3.00617	0.892108	1.9978	2.5931	2.50932	1.92821	2.06419	1.71354	1.14199	2.77744	14.1893	-1.13955	-0.301494	-2.31832	-4.56986	-0.536868	-0.758178	0.131245	-2.58496	0.466161	-0.628175	0.448375	-1.30426	-0.141137	0.235128	0.187746	-0.192293	-0.0939761	-0.36257	-0.948002	0.334204	0.680851	1.21712	0.300752	0.0631579	1.0339	0.886864	1.64286
99-101 cm	99	1895.52	1.86337	0.265038	0.0927632	1.34428	1.13307	2.25558	0.308036	1.98131	1.07869	2.67808	0.845155	1.92494	1.94483	2.46949	1.68718	1.78632	1.63194	1.08846	2.74625	12.6747	-1.13955	-0.241634	-3.05528	-4.56986	-0.712718	-0.959317	0.0339473	-2.80735	-0.153095	-1.03027	0.28165	-1.38226	-0.194741	-0.179909	0.164663	-0.384938	-0.302563	-0.432959	-1.01726	0.317913	0.680851	1.26868	0.180451	0.0631579	0.915254	0.77145	1.53571
101-103 cm	101	1893.22	1.8123	0.353383	0.0927632	1.49364	1.19255	2.20313	0.338839	1.44683	1.15574	2.76964	0.915584	2.00995	2.1069	2.35	1.73739	1.90541	1.46875	1.08846	2.60316	13.4842	-1.13955	-0.281731	-2.64024	-4.56986	-0.560715	-0.885506	3.20343e-16	-2.66985	-0.606651	-0.930737	0.330149	-1.26679	-0.132393	-0.0644319	0.0931094	-0.342627	-0.209453	-0.584963	-1.01726	0.240714	0.680851	1.23391	0.240602	0.0631579	1.01695	0.811946	1.5
103-104 cm	103	1890.93	1.68901	0.530075	0.0927632	1.79237	1.49886	2.51786	0.328571	1.44343	2.00328	2.99854	0.915584	2.45323	3.24138	2.35	1.89808	2.22297	1.71354	1.19552	3.03244	16.2692	-1.13955	-0.383371	-2.05528	-4.56986	-0.297681	-0.555685	0.192645	-2.71425	-0.61005	-0.137188	0.444708	-1.26679	0.155131	0.557057	0.0931094	-0.215013	0.0129391	-0.36257	-0.881913	0.460926	0.680851	1.14997	0.360902	0.0631579	1.22034	1.0205	1.71429
104-106 cm	104	1888.63	1.8211	0.530075	0.0927632	1.59322	1.29366	2.20313	0.328571	0.554904	1.38689	2.69334	0.986014	2.42287	2.26897	2.42966	1.76752	1.82601	1.63194	1.17768	2.67838	16.2079	-1.13955	-0.274737	-2.05528	-4.56986	-0.467606	-0.768093	3.20343e-16	-2.71425	-1.98924	-0.667703	0.289847	-1.15987	0.137165	0.0424833	0.141204	-0.317824	-0.270854	-0.432959	-0.903608	0.281807	0.680851	1.2399	0.360902	0.0631579	1.08475	0.88079	1.5
106-108 cm	106	1886.34	1.7487	0.392648	0.0824561	1.21704	1.179	1.91171	0.30119	0.51443	1.09581	2.55685	1.02253	2.0673	1.94483	2.30132	1.57113	1.62312	1.37809	1.04682	2.26337	15.3841	-0.969626	-0.163344	-2.31832	-4.56986	-0.686246	-0.732065	-0.0347654	-2.66985	-1.92858	-0.837628	0.384744	-0.937479	0.0781202	-0.00998409	0.232834	-0.317824	-0.270854	-0.50696	-0.903608	0.208846	0.765957	1.33943	0.300752	0.0631579	0.932203	0.903063	1.46429
108-110 cm	108	1884.04	1.77375	0.392648	0.0824561	1.17279	1.1975	1.86508	0.292063	0.366153	1.13005	2.50938	1.00167	1.99713	1.94483	2.37213	1.57113	1.55255	1.52315	0.951658	2.18836	15.0967	-0.969626	-0.142826	-2.31832	-4.56986	-0.739685	-0.709597	-0.0703893	-2.71425	-2.41911	-0.793234	0.357704	-0.967226	0.0283011	-0.00998409	0.276556	-0.317824	-0.334984	-0.36257	-1.04111	0.160224	0.765957	1.35862	0.300752	0.0631579	0.898305	0.917236	1.42857
110-112 cm	110	1881.75	1.69782	0.42406	0.0742105	1.05551	1.09916	1.51071	0.262857	0.340432	0.98623	2.14857	0.976623	1.69054	1.62069	2.10305	1.33368	1.3973	1.30556	0.842217	1.86679	15.2042	-0.817623	-0.0539405	-2.05528	-4.56986	-0.739685	-0.681216	-0.222392	-2.71425	-2.37219	-0.837628	0.285754	-0.851749	-0.0601369	-0.121015	0.25486	-0.402216	-0.334984	-0.432959	-1.06536	0.0829376	0.851064	1.44495	0.360902	0.0631579	0.898305	0.935459	1.28571
112-114 cm	112	1879.45	1.69641	0.282707	0.0742105	1.31441	1.08251	1.88839	0.279286	0.334985	0.92459	2.40494	1.18322	1.77313	1.1669	2.26237	1.59077	1.58784	1.50139	0.942141	2.18233	14.5732	-0.817623	-0.0551383	-2.64024	-4.56986	-0.423211	-0.703242	0.0995357	-2.62678	-2.39546	-0.930737	0.448375	-0.574909	0.0086723	-0.594947	0.360213	-0.147899	-0.15056	-0.231326	-0.903608	0.308244	0.851064	1.44375	0.240602	0.0631579	1.11864	0.921286	1.60714
114-116 cm	114	1877.16	1.71332	0.282707	0.0742105	1.09534	0.996862	1.67857	0.262857	0.294133	0.801311	2.42935	1.05175	1.73912	0.972414	2.19864	1.41402	1.36554	1.50139	0.927866	2.11482	14.3621	-0.817623	-0.0408304	-2.64024	-4.56986	-0.686246	-0.822158	-0.0703893	-2.71425	-2.58308	-1.13719	0.462947	-0.744834	-0.0192646	-0.857981	0.318991	-0.317824	-0.368151	-0.231326	-0.925634	0.262909	0.851064	1.45814	0.240602	0.0631579	0.932203	0.848393	1.42857
116-118 cm	116	1874.86	1.75136	0.282707	0.0742105	1.07542	0.989724	1.67857	0.254643	0.280516	0.708852	2.39273	1.08931	1.65654	0.907586	2.19864	1.41402	1.3973	1.30556	0.856492	1.91375	13.95	-0.817623	-0.00914737	-2.64024	-4.56986	-0.712718	-0.832525	-0.0703893	-2.76005	-2.65147	-1.31407	0.441033	-0.694208	-0.0894524	-0.957517	0.318991	-0.317824	-0.334984	-0.432959	-1.04111	0.118783	0.851064	1.49052	0.240602	0.0631579	0.915254	0.842318	1.42857
118-120 cm	118	1872.44	1.68373	0.282707	0.0742105	0.955932	0.963554	1.80446	0.23	0.272345	0.678033	2.53312	1.05175	1.78284	0.777931	2.19864	1.33368	1.3973	1.50139	0.913591	2.10308	14.536	-0.817623	-0.0659631	-2.64024	-4.56986	-0.882643	-0.871187	0.0339473	-2.90689	-2.69411	-1.3782	0.52329	-0.744834	0.0165559	-1.17991	0.318991	-0.402216	-0.334984	-0.231326	-0.948002	0.254878	0.851064	1.43296	0.240602	0.0631579	0.813559	0.820046	1.53571
120-122 cm	120	1870.03	1.92247	0.314119	0.0824561	1.17279	1.08383	2.05159	0.246429	0.296554	0.719126	2.69928	1.18948	1.90537	0.792337	2.23051	1.54435	1.62312	1.59568	1.18957	2.44111	14.2175	-0.969626	-0.0266631	-2.64024	-4.56986	-0.739685	-0.853485	0.0671142	-2.95936	-2.72326	-1.44531	0.462947	-0.719299	-0.039556	-1.30544	0.187746	-0.342627	-0.270854	-0.295456	-0.719183	0.317913	0.765957	1.47253	0.240602	0.0631579	0.898305	0.83017	1.57143
122-124 cm	122	1867.61	1.73461	0.235589	0.0824561	0.862994	0.980736	1.67857	0.246429	0.28445	0.650638	2.55685	1.10601	1.8406	0.648276	2.69077	1.24084	1.37613	1.45062	0.951658	2.11824	13.5383	-0.969626	-0.175016	-3.05528	-4.56986	-1.1822	-0.997689	-0.222392	-2.95936	-2.78338	-1.5897	0.384744	-0.824268	-0.0894524	-1.59495	0.458394	-0.658314	-0.509014	-0.432959	-1.04111	0.11324	0.765957	1.32864	0.180451	0.0631579	0.661017	0.751202	1.28571
124-126 cm	124	1865.2	1.66682	0.21203	0.0742105	0.975847	0.915971	1.7625	0.238214	0.288686	0.554754	2.6674	1.08931	1.84114	0.518621	2.51729	1.39795	1.46081	1.50139	0.899317	2.26011	14.4416	-0.817623	-0.0805236	-3.05528	-4.56986	-0.852896	-0.94425	3.20343e-16	-2.85626	-2.61005	-1.6677	0.597812	-0.694208	0.0629737	-1.76487	0.514247	-0.334312	-0.270854	-0.231326	-0.970722	0.358769	0.851064	1.41857	0.180451	0.0631579	0.830508	0.779549	1.5
126-128 cm	126	1862.78	1.7415	0.21203	0.0742105	1.09534	0.930246	1.93036	0.238214	0.296856	0.493115	2.74675	1.12687	1.7537	0.388966	2.29424	1.46222	1.55608	1.56667	0.856492	2.2924	13.8433	-0.817623	-0.0172949	-3.05528	-4.56986	-0.686246	-0.92194	0.131245	-2.85626	-2.56979	-1.83763	0.640104	-0.645298	-0.00722532	-2.17991	0.380391	-0.269461	-0.179706	-0.169925	-1.04111	0.379233	0.851064	1.48213	0.180451	0.0631579	0.932203	0.791698	1.64286
128-130 cm	128	1860.36	1.76686	0.21203	0.0742105	1.01568	0.927866	1.80446	0.23	0.275069	0.523934	2.58195	1.01419	1.88972	0.324138	2.99525	1.35778	1.3973	1.50139	0.885042	2.18379	15.043	-0.817623	0.00356368	-3.05528	-4.56986	-0.79518	-0.925634	0.0339473	-2.90689	-2.67976	-1.75017	0.550837	-0.797301	0.100546	-2.44294	0.765055	-0.376376	-0.334984	-0.231326	-0.993806	0.309213	0.851064	1.50371	0.180451	0.0631579	0.864407	0.789674	1.53571
130-132.5 cm	130	1857.95	1.81915	0.392648	0.0824561	1.08427	1.0574	2.14484	0.292063	0.378257	0.787614	3.0316	1.16861	2.16985	0.576245	2.65537	1.46401	1.76426	1.81327	0.999241	2.62375	16.5269	-0.969626	-0.106364	-2.31832	-4.56986	-0.852896	-0.889108	0.131245	-2.71425	-2.37219	-1.31407	0.630454	-0.744834	0.147971	-1.76487	0.439285	-0.419703	-0.15056	-0.111031	-0.970722	0.422003	0.765957	1.39339	0.300752	0.0631579	0.830508	0.809922	1.64286
Maximum		….	1.92247	2.04177	10.5694	3.10109	1.62462	4.07653	1.18651	3.39751	3.08197	3.90649	1.34883	2.94249	3.33399	2.99525	2.96117	3.67471	2.2381	13.8466	4.58731	329.435	-0.439112	0.00356368	0.0601948	2.7217	0.427212	-0.321076	0.836501	-0.485427	0.624926	0.605316	0.730205	-0.212339	0.793836	0.557057	0.965354	0.336487	0.665016	-0.111031	3.11134	0.977069	0.887943	1.07534	0.571429	2.87649	1.24266	0.930262	1.24107
			Al	As	Cd	Ce	Fe	Hf	Mg	Mn	Mo	Nb	P	Pb	S	Sn	Th	U	W	Zn	Zr		Sc	Al	As	Cd	Ce	Fe	Hf	Mg	Mn	Mo	Nb	P	Pb	S	Sn	Th	U	W	Zn	Zr	Sc	Al	As	Cd	Ce	Fe	Hf
[truncated: 12 more columns]
