# Supplementary material for: Unraveling Anthropocene Paleoenvironmental Conditions Combining Sediment and Foraminiferal Data: Proof-of-Concept in the Sepetiba Bay (SE, Brazil)
Source: Frontiers journal article supplement (doi:10.3389/fevo.2022.852439), 2022-03-28
Supplement: Table_4.xlsx [file Table_4.xlsx]

## Sheet: SP5 N.º
Table S4. Number of benthic foraminifera found in the analysed sediment layers (per 10 ml of sediment)
Interval	0-3cm	09-11cm	14-17cm	19-22cm	24-26.5cm	29-32cm	34-36cm	36-39cm	43-45cm	47-49cm	52-54cm	56-58cm	60-62cm	64-66cm	68-71cm	73-75cm	77-79cm	81-83cm	85-87cm	89-91cm	93-95cm	97-99cm	101-103cm	104-106cm	108-110cm	112-114cm	116-118cm	120-122cm	124-126cm	128-130cm	130-132.5cm
Layer	0	9	14	19	24	29	34	36	43	47	52	56	60	64	68	73	77	81	85	89	93	97	101	104	108	112	116	120	124	128	130
Year/Species	2015	2004	2001	1998	1989	1980	1973.92	1970.9	1963.05	1957.98	1952.66	1947.35	1942.51	1937.68	1932.61	1927.29	1921.98	1917.14	1912.31	1907.48	1902.65	1897.81	1893.22	1888.63	1884.04	1879.45	1874.86	1870.03	1865.2	1860.36	1857.95
Acostata mariae (Acosta, 1940)	1
Ammonia parkinsoniana (d’ Orbigny, 1839)	6	3	8	3	6	7		2	2			1	1	1
Ammonia rolshauseni (Cushman & Bermúdez, 1946)	6	4	19	5	3	2	1
Ammonia tepida (Cushman, 1926)	216	115	279	205	107	76	29	16	16	4	1
Ammotium sp.	1
Asterotrochammina camposi Brönnimann, 1978			1
Bolivina compacta Sidebottom, 1905	2
Bolivina dilatata Reuss, 1850	1
Bolivina ordinaria Phleger & Parker, 1952	1	3	3			2
Bolivina seminuda Cushman, 1911	1
Bolivina striatula Cushman, 1922	18	12	14	1	3	3	3		2	2	2	1
Buccella peruviana (d'Orbigny, 1839)	2						1	1
Bulimina aculeata d’ Orbigny, 1826	2	2
Bulimina patagonica d'Orbigny, 1839		2
Buliminella elegantissima (d’ Orbigny, 1839)	107	49	92	26	41	47	17	21	33	4	8	12		3
Cribroelphidium excavatum (Terquem, 1875)	14	10	19	13	2	1	1	1	1	1	3			3
Cribroelphidium gunteri (Cole, 1931)					1
Cribroelphidium poeyanum (d'Orbigny, 1839)												1
Elphidium albiumbilicatum (Weiss, 1954)		1
Elphidium incertum (Williamson 1858)	1
Elphidium oceanense (d'Orbigny in Fornasini, 1904)							1
Elphidium spp. (poorly preserved)												1
Fursenkoina cornuta (Cushman, 1913)						1
Globocassidulina crassa (d'Orbigny, 1839)	2	3							1
Globocassidulina subglobosa (Brady, 1881)			1	1
Hopkinsina pacifica Cushman, 1933	4	1	1
Indetermined dissoved		2			4					1	3	2
Lepidodeuterammina ochracea (Williamson, 1858)			1
Miliolinella laysanensis Rhumbler, 1936		1
Nonionella auris (d'Orbigny, 1839)		2						1
Oolina globosa (Montagu, 1803)			1
Pararotalia sarmientoi (Redmond, 1953)	4	3	5	9	2	8	1
Pseudononion japonicum Asano, 1936	4	2	1			1
Quinqueloculina bosciana d'Orbigny, 1839									1
Quinqueloculina laevigata d'Orbigny, 1839	1
Rosalina lomaensis (Bandy, 1953)									1					1
Sagrina pulchella d'Orbigny, 1839			1
Stainforthia fusiformis sp.	1
Tiphotrocha concava Seiglie, 1964		1
Maximum	395	216	446	263	169	148	54	42	57	12	17	18	1	8	Barren for foraminifera

## Sheet: SP5 %
Table S4. Percentage of benthic foraminifera found in the analysed sediment layers
Year	2015	2004	2001	1998	1989	1980	Max.
Layer	0-3 cm	9-11 cm	14-17 cm	19-22 cm	24-26.5 cm	29-32 cm
Acostata mariae (Acosta, 1940)	0.253165	0	0	0	0	0	0.253165
Ammonia parkinsoniana (d’ Orbigny, 1839)	1.51899	1.38889	1.79372	1.14068	3.5503	4.72973	4.72973
Ammonia rolshauseni (Cushman & Bermúdez, 1946)	1.51899	1.85185	4.26009	1.90114	1.77515	1.35135	4.26009
Ammonia tepida (Cushman, 1926)	54.6835	53.2407	62.5561	77.9468	63.3136	51.3514	77.9468
Ammotium sp.	0.253165	0	0	0	0	0	0.253165
Asterotrochammina camposi Brönnimann, 1978	0	0	0.224215	0	0	0	0.224215
Bolivina compacta Sidebottom, 1905	0.506329	0	0	0	0	0	0.506329
Bolivina dilatata Reuss, 1850	0.253165	0	0	0	0	0	0.253165
Bolivina ordinaria Phleger & Parker, 1952	0.253165	1.38889	0.672646	0	0	1.35135	1.38889
Bolivina seminuda Cushman, 1911	0.253165	0	0	0	0	0	0.253165
Bolivina striatula Cushman, 1922	4.55696	5.55556	3.13901	0.380228	1.77515	2.02703	5.55556
Buccella peruviana (d'Orbigny, 1839)	0.506329	0	0	0	0	0	0.506329
Bulimina aculeata d’ Orbigny, 1826	0.506329	0.925926	0	0	0	0	0.925926
Bulimina patagonica d'Orbigny, 1839	0	0.925926	0	0	0	0	0.925926
Buliminella elegantissima (d’ Orbigny, 1839)	27.0886	22.6852	20.6278	9.88593	24.2604	31.7568	31.7568
Cribroelphidium excavatum (Terquem, 1875)	3.5443	4.62963	4.26009	4.94297	1.18343	0.675676	4.94297
Cribroelphidium gunteri (Cole, 1931)	0	0	0	0	0.591716	0	0.591716
Cribroelphidium poeyanum (d'Orbigny, 1839)	0	0	0	0	0	0	0
Elphidium albiumbilicatum (Weiss, 1954)	0	0.462963	0	0	0	0	0.462963
Elphidium incertum (Williamson 1858)	0.253165	0	0	0	0	0	0.253165
Elphidium oceanense (d'Orbigny in Fornasini, 1904)	0	0	0	0	0	0	0
Elphidium spp. (poorly preserved)	0	0	0	0	0	0	0
Fursenkoina cornuta (Cushman, 1913)	0	0	0	0	0	0.675676	0.675676
Globocassidulina crassa (d'Orbigny, 1839)	0.506329	1.38889	0	0	0	0	1.38889
Globocassidulina subglobosa (Brady, 1881)	0	0	0.224215	0.380228	0	0	0.380228
Hopkinsina pacifica Cushman, 1933	1.01266	0.462963	0.224215	0	0	0	1.01266
Indetermined dissoved	0	0.925926	0	0	2.36686	0	2.36686
Lepidodeuterammina ochracea (Williamson, 1858)	0	0	0.224215	0	0	0	0.224215
Miliolinella laysanensis Rhumbler, 1936	0	0.462963	0	0	0	0	0.462963
Nonionella auris (d'Orbigny, 1839)	0	0.925926	0	0	0	0	0.925926
Oolina globosa (Montagu, 1803)	0	0	0.224215	0	0	0	0.224215
Pararotalia sarmientoi (Redmond, 1953)	1.01266	1.38889	1.12108	3.42205	1.18343	5.40541	5.40541
Pseudononion japonicum Asano, 1936	1.01266	0.925926	0.224215	0	0	0.675676	1.01266
Quinqueloculina bosciana d'Orbigny, 1839	0	0	0	0	0	0	0
Quinqueloculina laevigata d'Orbigny, 1839	0.253165	0	0	0	0	0	0.253165
Rosalina lomaensis (Bandy, 1953)	0	0	0	0	0	0	0
Sagrina pulchella d'Orbigny, 1839	0	0	0.224215	0	0	0	0.224215
Stainforthia fusiformis sp.	0.253165	0	0	0	0	0	0.253165
Tiphotrocha concava Seiglie, 1964	0	0.462963	0	0	0	0	0.462963

## Sheet: SP5 Ecol Param.
Table S4. Ecological parameters of benthic foraminifera found in the analysed sediment layers
Legend: FD - foraminifera density (N.º/10 ml). SR - species richness. H' Shannon Index. J' - Equitability
Interval	Level	Year	FD (nº/10 ml)	SR	exp(H'bc)	J'
0-3cm	0	2015	395	22	8.38276	0.456828
09-11cm	9	2004.13	216	19	7.43217	0.507571
14-17cm	14	2001	446	16	5.55481	0.475144
19-22cm	19	1998	263	9	2.68343	0.51022
24-26.5cm	24	1989	169	10	3.4757	0.543931
29-32cm	29	1979.97	148	11	4.32103	0.56122
34-36cm	34	1973.92	54	9
36-39cm	36	1970.9	42	7
43-45cm	43	1963.05	57	9
47-49cm	47	1957.98	12	6
52-54cm	52	1952.66	17	6
56-58cm	56	1947.35	18	7
60-62cm	60	1942.51	1	2
64-66cm	64	1937.68	8	5
68-71cm	68	1932.61
73-75cm	73	1927.29
77-79cm	77	1921.98
81-83cm	81	1917.14
85-87cm	85	1912.31
89-91cm	89	1907.48
93-95cm	93	1902.65
97-99cm	97	1897.81
101-103cm	101	1893.22
104-106cm	104	1888.63
108-110cm	108	1884.04
112-114cm	112	1879.45
116-118cm	116	1874.86
120-122cm	120	1870.03
124-126cm	124	1865.2
128-130cm	128	1860.36
130-132.5cm	130	1857.95
