# Supplementary material for: Unraveling Anthropocene Paleoenvironmental Conditions Combining Sediment and Foraminiferal Data: Proof-of-Concept in the Sepetiba Bay (SE, Brazil)
Source: Frontiers journal article supplement (doi:10.3389/fevo.2022.852439), 2022-03-28
Supplement: Table_5.xlsx [file Table_5.xlsx]

## Sheet: EQR
Table S5. Ecological Quality Ratio (EQR) estimated from the the expH'bc/expH'bc(ref) for cores SP8 and SP5. The expH'bc(ref) correspomnds to that estimated for the level of 72 cm in core SP8
The EQR was classified acording to Van de Bund and Solimini (2007).
The core SP8 data were described by Castelo et al. (2021a) and are available and associated with that work. They were placed in this to facilitate the understanding of the choice for the reference exp(H'bc)
Core SP8				Core SP5
Level (cm)	exp(H'bc)	EQR		Interval	Year	exp(H'bc)	EQR1			EQR Classification
0	3.155	0.256504		0-3 cm	2015	8.38276	0.67062
4	7.64	0.621138		9-11 cm	2004.13	7.43217	0.594574			0-0.2	Bad
8	5.006	0.406992		14-17 cm	1998.09	5.55481	0.444385			0.2-0.4	Poor
12	3.517	0.285935		19-22 cm	1992.05	2.68343	0.214675			0.4-0.6	Moderate
16	10.899	0.886098		24-26.5 cm	1986.01	3.4757	0.278056			0.6-0.8	Good
20	5.682	0.461951		29-32 cm	1979.97	4.32103	0.345683			0.8-1	Excellent
24	6.347	0.516016
28	8.038	0.653496
32	8.985	0.730488
36	7.095	0.576829
40	7.228	0.587642
44	7.457	0.60626
48	7.552	0.613984
52	8.752	0.711545
56	10.787	0.876992
60	8.135	0.661382
64	9.527	0.774553
68	11.454	0.93122
72	12.296	0.999675	REF for EQR
76	8.282
80	10.205
86	6.83
90	5.264
94	4.587
98	7.784
102	4.362
106	2.714
110	1.943
114	2.251
118	6.263
122	5.166
126	2.952
130	2.769
134	6.013
Van de Bund, W., Solimini, A. (2007). Ecological Quality Ratios for ecological quality assessment in inland and marine waters. Institute for Environment and Sustainability (ed), Italy.
Castelo, W.F.L., Alves Martins, M.V., Martínez-Colón, M., Guerra, J.V., Dadalto, T.P., Terroso, D., Soares, M.F., Frontalini, F., Duleba, W., Socorro, O.A.A., Geraldes, M.C., Rocha, F., Bergamaschi, S. (2021 a). Disentangling natural vs. anthropogenic induced environmental variability during the Holocene: Marambaia Cove, SE sector of the Sepetiba Bay SE Brazil. Environmental Science Pollution Res…
