# Supplementary material for: Unraveling Anthropocene Paleoenvironmental Conditions Combining Sediment and Foraminiferal Data: Proof-of-Concept in the Sepetiba Bay (SE, Brazil)
Source: Frontiers journal article supplement (doi:10.3389/fevo.2022.852439), 2022-03-28
Supplement: Table_6.xlsx [file Table_6.xlsx]

## Sheet: Stat
Statistical results
A. Eigenvalues of correlation matrix, and related statistics (active variables only) of the PCA of Figure 7 A							B. Spearman Rank Order Correlations. Red correlations are significant at p <0.050
Value number	Eigenvalue	% Total variance	Cumulative Eigenvalue	Cumulative %				Al	As	Ba	Be	Bi	Ca	Cd	Ce	Co	Cr	Cu	Fe	Hf	In	K	La	Li	Mg	Mn	Mo	Na	Nb	Ni	P	Pb	Rb	S	Sb	Sc	Sn	Sr	Ta	Th	Ti	Tl	U	V	W	Y	Zn	Zr	Anatase
1	12.6	66.3	12.6	66.3			Al	1	-0.769385	-0.473419	-0.391941	0.521702	-0.709326	-0.617492	-0.505994	-0.755638	-0.220009	-0.644719	-0.732006	0.589554	0.36217	-0.778758	-0.391026	0.467974	-0.869965	-0.299355	0.242769	-0.716973	0.832648	-0.482263	-0.602	0.276458	-0.746783	0.371698	-0.865811	-0.508565	0.382775	-0.73216	0.847299	0.662584	0.802429	-0.258607	-0.0908666	0.894967	0.850965	-0.676197	-0.629112	0.550319	0.0571291
2	3.22	16.95	15.82	83.25			As	-0.769385	1	0.300168	0.434743	-0.228652	0.749213	0.79728	0.589623	0.707729	0.362993	0.787541	0.804701	-0.596211	-0.343156	0.551724	0.514761	-0.33542	0.718542	0.322152	0.0250258	0.816757	-0.690312	0.634465	0.635898	0.0765781	0.672726	-0.0831368	0.83044	0.590631	0.013193	0.792437	-0.707096	-0.534264	-0.661386	0.57564	0.144566	-0.744799	-0.735149	0.826804	0.794113	-0.639598	-0.0541117
3	0.88	4.64	16.7	87.89			Ba	-0.473419	0.300168	1	0.310077	-0.368789	0.416778	0.43372	0.00157137	0.57774	0.356628	0.370074	0.449777	-0.694218	-0.183528	0.346868	-0.130431	-0.440993	0.710414	-0.329193	-0.802678	0.429919	-0.694417	0.627506	0.685132	-0.243907	0.602476	-0.854052	0.525942	0.696061	-0.122163	0.337023	-0.673508	-0.706771	-0.692744	-0.0318187	-0.375674	-0.415561	-0.583401	0.360363	0.397743	-0.571603	0.00249472
4	0.72	3.79	17.42	91.68			Be	-0.391941	0.434743	0.310077	1	-0.117042	0.418506	0.487316	0.420207	0.441287	0.307041	0.483594	0.355549	-0.334911	-0.0312797	0.398715	0.330313	-0.201256	0.467425	0.265788	-0.135881	0.471844	-0.298555	0.436409	0.378727	0.207056	0.579742	-0.192949	0.476529	0.472396	0.10982	0.483775	-0.358038	-0.344912	-0.316844	0.341291	0.0541307	-0.408858	-0.293062	0.497067	0.43828	-0.36785	-0.0739454
5	0.45	2.39	17.87	94.07			Bi	0.521702	-0.228652	-0.368789	-0.117042	1	-0.175531	-0.034642	0.0447891	-0.287855	0.0394188	0.010339	-0.483946	0.317089	0.248259	-0.45706	0.14534	0.306128	-0.505417	0.0723142	0.419496	-0.113548	0.571975	-0.162018	-0.153316	0.749427	-0.353745	0.425399	-0.447523	-0.207279	0.724542	-0.083622	0.56428	0.440471	0.524028	0.33446	0.0305804	0.347579	0.581225	-0.048146	-0.0270954	0.188259	-0.160113
6	0.34	1.79	18.21	95.86			Ca	-0.709326	0.749213	0.416778	0.418506	-0.175531	1	0.84445	0.499832	0.800006	0.314779	0.889745	0.604876	-0.682801	-0.469205	0.447817	0.454327	-0.273847	0.744694	0.360178	-0.255469	0.826558	-0.707848	0.630259	0.795521	0.151854	0.648679	-0.275464	0.688254	0.765757	0.0897296	0.887324	-0.692235	-0.67125	-0.717991	0.588376	-0.140659	-0.772785	-0.686552	0.826854	0.865063	-0.74624	-0.0850149
7	0.27	1.43	18.48	97.28			Cd	-0.617492	0.79728	0.43372	0.487316	-0.034642	0.84445	1	0.451174	0.721417	0.373519	0.934812	0.58918	-0.797878	-0.38451	0.299695	0.401494	-0.315586	0.670505	0.296727	-0.210269	0.884928	-0.659344	0.777314	0.801327	0.372673	0.630674	-0.237484	0.677103	0.803523	0.382977	0.785191	-0.680074	-0.689094	-0.704431	0.677331	-0.271154	-0.689655	-0.664329	0.876283	0.952934	-0.878518	-0.130838
8	0.19	1	18.67	98.28			Ce	-0.505994	0.589623	0.00157137	0.420207	0.0447891	0.499832	0.451174	1	0.477112	0.0954952	0.540307	0.395233	-0.0584399	-0.226628	0.693884	0.931135	0.00301749	0.456223	0.630219	0.319937	0.555177	-0.219765	0.179864	0.264059	0.295274	0.611532	0.182641	0.595466	0.184086	-0.0132712	0.70155	-0.217839	0.0567219	-0.183337	0.480902	0.452871	-0.556451	-0.326409	0.737811	0.493038	-0.16755	-0.0712766
9	0.12	0.63	18.79	98.91			Co	-0.755638	0.707729	0.57774	0.441287	-0.287855	0.800006	0.721417	0.477112	1	0.193418	0.750379	0.749308	-0.692682	-0.46621	0.617457	0.377511	-0.234534	0.86369	0.317517	-0.412769	0.808074	-0.72756	0.602334	0.771129	0.0509413	0.832054	-0.374318	0.737214	0.717387	-0.0875322	0.768427	-0.739845	-0.693603	-0.736243	0.505301	-0.108274	-0.683145	-0.709277	0.785918	0.72288	-0.668164	-0.0986355
10	0.09	0.48	18.89	99.39			Cr	-0.220009	0.362993	0.356628	0.307041	0.0394188	0.314779	0.373519	0.0954952	0.193418	1	0.368663	0.258901	-0.252032	-0.0809425	0.0175833	0.0511858	-0.340054	0.225329	-0.292733	-0.114643	0.300002	-0.240147	0.514238	0.45009	0.0478023	0.125626	-0.392399	0.355195	0.471358	0.253784	0.242963	-0.293982	-0.238871	-0.213668	0.192838	-0.0249895	-0.176416	-0.229113	0.29999	0.402593	-0.360537	0.0597811
11	0.07	0.36	18.95	99.76			Cu	-0.644719	0.787541	0.370074	0.483594	0.010339	0.889745	0.934812	0.540307	0.750379	0.368663	1	0.57004	-0.674669	-0.397661	0.380472	0.517361	-0.319541	0.667028	0.409505	-0.143982	0.882024	-0.60749	0.65487	0.754187	0.364323	0.638718	-0.214571	0.688249	0.751885	0.324314	0.84208	-0.624071	-0.617647	-0.633565	0.717677	-0.1207	-0.704456	-0.598677	0.876502	0.932234	-0.771759	-0.090236
12	0.03	0.15	18.98	99.91			Fe	-0.732006	0.804701	0.449777	0.355549	-0.483946	0.604876	0.58918	0.395233	0.749308	0.258901	0.57004	1	-0.57126	-0.332167	0.561157	0.304271	-0.316303	0.785877	0.1173	-0.229816	0.632203	-0.730399	0.594167	0.601453	-0.226854	0.699979	-0.269622	0.805072	0.586906	-0.299088	0.584417	-0.763886	-0.571258	-0.671607	0.310972	0.0153089	-0.562	-0.781765	0.649867	0.576667	-0.557028	-0.0676175
13	0.02	0.09	19	100			Hf	0.589554	-0.596211	-0.694218	-0.334911	0.317089	-0.682801	-0.797878	-0.0584399	-0.692682	-0.252032	-0.674669	-0.57126	1	0.339054	-0.22912	0.0362227	0.364123	-0.736098	0.064952	0.590649	-0.727954	0.812149	-0.774949	-0.79075	0.00388564	-0.590127	0.529263	-0.585656	-0.82579	-0.122928	-0.544339	0.830721	0.896022	0.864409	-0.319202	0.586738	0.577875	0.749323	-0.611934	-0.719857	0.934872	0.120522
							In	0.36217	-0.343156	-0.183528	-0.0312797	0.248259	-0.469205	-0.38451	-0.226628	-0.46621	-0.0809425	-0.397661	-0.332167	0.339054	1	-0.290912	-0.237066	0.0931446	-0.36453	-0.155837	0.106812	-0.389651	0.373032	-0.268756	-0.269623	-0.0139964	-0.371487	0.12243	-0.37075	-0.366138	0.0689408	-0.384699	0.348906	0.317508	0.354112	-0.277495	0.0643162	0.376674	0.353446	-0.388606	-0.421319	0.339222	-0.0393753
							K	-0.778758	0.551724	0.346868	0.398715	-0.45706	0.447817	0.299695	0.693884	0.617457	0.0175833	0.380472	0.561157	-0.22912	-0.290912	1	0.583927	-0.209668	0.748738	0.419874	-0.0950216	0.486855	-0.509325	0.198863	0.311023	-0.213097	0.778627	-0.21716	0.740924	0.215375	-0.504122	0.598902	-0.52605	-0.288771	-0.438311	0.0979147	0.395522	-0.67811	-0.557504	0.529171	0.326689	-0.186313	0.0448943
							La	-0.391026	0.514761	-0.130431	0.330313	0.14534	0.454327	0.401494	0.931135	0.377511	0.0511858	0.517361	0.304271	0.0362227	-0.237066	0.583927	1	0.109683	0.347601	0.72643	0.440687	0.492629	-0.107322	0.0624557	0.131236	0.349471	0.522365	0.323149	0.48769	0.0886396	0.0366962	0.657165	-0.106754	0.165972	-0.0660061	0.512457	0.507438	-0.473335	-0.224636	0.660514	0.460666	-0.0809226	-0.0731815
							Li	0.467974	-0.33542	-0.440993	-0.201256	0.306128	-0.273847	-0.315586	0.00301749	-0.234534	-0.340054	-0.319541	-0.316303	0.364123	0.0931446	-0.209668	0.109683	1	-0.342446	0.275677	0.455492	-0.175142	0.448476	-0.35971	-0.409088	0.267869	-0.211685	0.656915	-0.428217	-0.379262	0.0678416	-0.224958	0.403061	0.540347	0.393592	0.00850807	0.0844322	0.394541	0.43024	-0.18477	-0.268536	0.298062	-0.182125
							Mg	-0.869965	0.718542	0.710414	0.467425	-0.505417	0.744694	0.670505	0.456223	0.86369	0.225329	0.667028	0.785877	-0.736098	-0.36453	0.748738	0.347601	-0.342446	1	0.220439	-0.469545	0.771633	-0.874599	0.628048	0.719357	-0.220146	0.888902	-0.511292	0.865998	0.694434	-0.311883	0.736261	-0.884401	-0.742856	-0.851614	0.263974	-0.074412	-0.776913	-0.848431	0.714876	0.664135	-0.671747	-0.0718881
							Mn	-0.299355	0.322152	-0.329193	0.265788	0.0723142	0.360178	0.296727	0.630219	0.317517	-0.292733	0.409505	0.1173	0.064952	-0.155837	0.419874	0.72643	0.275677	0.220439	1	0.43092	0.430862	-0.0179122	-0.0960801	-0.0212606	0.319173	0.356571	0.485371	0.228628	-0.0443051	0.0252283	0.521664	-0.0045221	0.0923334	-0.0230671	0.471598	0.416787	-0.395801	-0.0865317	0.436611	0.32202	-0.00136166	-0.0888867
							Mo	0.242769	0.0250258	-0.802678	-0.135881	0.419496	-0.255469	-0.210269	0.319937	-0.412769	-0.114643	-0.143982	-0.229816	0.590649	0.106812	-0.0950216	0.440687	0.455492	-0.469545	0.43092	1	-0.147789	0.527799	-0.434968	-0.561275	0.356644	-0.319757	0.867509	-0.228237	-0.566758	0.156723	-0.0966548	0.490954	0.701501	0.538978	0.225377	0.578464	0.191632	0.41491	-0.0786586	-0.147725	0.447768	-0.0739086
							Na	-0.716973	0.816757	0.429919	0.471844	-0.113548	0.826558	0.884928	0.555177	0.808074	0.300002	0.882024	0.632203	-0.727954	-0.389651	0.486855	0.492629	-0.175142	0.771633	0.430862	-0.147789	1	-0.673679	0.65715	0.762017	0.252446	0.739239	-0.179867	0.727812	0.7167	0.186582	0.845746	-0.709986	-0.631744	-0.720834	0.628446	-0.101252	-0.743879	-0.645984	0.874578	0.890151	-0.768475	-0.0687363
							Nb	0.832648	-0.690312	-0.694417	-0.298555	0.571975	-0.707848	-0.659344	-0.219765	-0.72756	-0.240147	-0.60749	-0.730399	0.812149	0.373032	-0.509325	-0.107322	0.448476	-0.874599	-0.0179122	0.527799	-0.673679	1	-0.630161	-0.700505	0.366492	-0.685686	0.53905	-0.78552	-0.70749	0.311231	-0.652343	0.948292	0.830917	0.965897	-0.200477	0.243582	0.779994	0.930097	-0.614229	-0.643259	0.731953	0.0826331
							Ni	-0.482263	0.634465	0.627506	0.436409	-0.162018	0.630259	0.777314	0.179864	0.602334	0.514238	0.65487	0.594167	-0.774949	-0.268756	0.198863	0.0624557	-0.35971	0.628048	-0.0960801	-0.434968	0.65715	-0.630161	1	0.798036	0.138206	0.548139	-0.487662	0.601055	0.807735	0.247598	0.525331	-0.6561	-0.670463	-0.645463	0.415172	-0.330261	-0.459677	-0.622893	0.611399	0.720193	-0.777518	-0.078279
							P	-0.602	0.635898	0.685132	0.378727	-0.153316	0.795521	0.801327	0.264059	0.771129	0.45009	0.754187	0.601453	-0.79075	-0.269623	0.311023	0.131236	-0.409088	0.719357	-0.0212606	-0.561275	0.762017	-0.700505	0.798036	1	0.101651	0.581687	-0.565994	0.634437	0.853007	0.198506	0.683462	-0.703693	-0.773969	-0.723833	0.427595	-0.38741	-0.599379	-0.667846	0.723746	0.774305	-0.812695	-0.0217468
							Pb	0.276458	0.0765781	-0.243907	0.207056	0.749427	0.151854	0.372673	0.295274	0.0509413	0.0478023	0.364323	-0.226854	0.00388564	-0.0139964	-0.213097	0.349471	0.267869	-0.220146	0.319173	0.356644	0.252446	0.366492	0.138206	0.101651	1	-0.005892	0.386461	-0.187155	0.102065	0.835986	0.188467	0.326239	0.173514	0.279183	0.640114	-0.0411886	0.1151	0.353624	0.307849	0.360011	-0.154571	-0.108459
							Rb	-0.746783	0.672726	0.602476	0.579742	-0.353745	0.648679	0.630674	0.611532	0.832054	0.125626	0.638718	0.699979	-0.590127	-0.371487	0.778627	0.522365	-0.211685	0.888902	0.356571	-0.319757	0.739239	-0.685686	0.548139	0.581687	-0.005892	1	-0.343324	0.829343	0.587658	-0.207253	0.713755	-0.711838	-0.544298	-0.667839	0.31736	0.0519551	-0.709003	-0.681785	0.75899	0.622889	-0.541956	-0.0685851
							S	0.371698	-0.0831368	-0.854052	-0.192949	0.425399	-0.275464	-0.237484	0.182641	-0.374318	-0.392399	-0.214571	-0.269622	0.529263	0.12243	-0.21716	0.323149	0.656915	-0.511292	0.485371	0.867509	-0.179867	0.53905	-0.487662	-0.565994	0.386461	-0.343324	1	-0.358333	-0.563423	0.180678	-0.140181	0.530605	0.654022	0.531462	0.235722	0.413378	0.275877	0.461062	-0.114266	-0.207675	0.408305	-0.166511
							Sb	-0.865811	0.83044	0.525942	0.476529	-0.447523	0.688254	0.677103	0.595466	0.737214	0.355195	0.688249	0.805072	-0.585656	-0.37075	0.740924	0.48769	-0.428217	0.865998	0.228628	-0.228237	0.727812	-0.78552	0.601055	0.634437	-0.187155	0.829343	-0.358333	1	0.591395	-0.260145	0.703282	-0.790398	-0.575336	-0.720389	0.318535	0.113119	-0.762936	-0.821796	0.768497	0.672981	-0.584662	-0.00509027
							Sc	-0.508565	0.590631	0.696061	0.472396	-0.207279	0.765757	0.803523	0.184086	0.717387	0.471358	0.751885	0.586906	-0.82579	-0.366138	0.215375	0.0886396	-0.379262	0.694434	-0.0443051	-0.566758	0.7167	-0.70749	0.807735	0.853007	0.102065	0.587658	-0.563423	0.591395	1	0.220673	0.637139	-0.695464	-0.764198	-0.738934	0.431949	-0.452067	-0.542596	-0.643177	0.675017	0.757823	-0.8213	-0.0583948
							Sn	0.382775	0.013193	-0.122163	0.10982	0.724542	0.0897296	0.382977	-0.0132712	-0.0875322	0.253784	0.324314	-0.299088	-0.122928	0.0689408	-0.504122	0.0366962	0.0678416	-0.311883	0.0252283	0.156723	0.186582	0.311231	0.247598	0.198506	0.835986	-0.207253	0.180678	-0.260145	0.220673	1	0.0574898	0.281658	0.0403699	0.206939	0.485403	-0.294599	0.189486	0.329747	0.207133	0.314401	-0.281267	0.00400247
							Sr	-0.73216	0.792437	0.337023	0.483775	-0.083622	0.887324	0.785191	0.70155	0.768427	0.242963	0.84208	0.584417	-0.544339	-0.384699	0.598902	0.657165	-0.224958	0.736261	0.521664	-0.0966548	0.845746	-0.652343	0.525331	0.683462	0.188467	0.713755	-0.140181	0.703282	0.637139	0.0574898	1	-0.630624	-0.498115	-0.648334	0.596408	0.0830325	-0.851796	-0.660218	0.866566	0.797599	-0.590637	-0.0688369
							Ta	0.847299	-0.707096	-0.673508	-0.358038	0.56428	-0.692235	-0.680074	-0.217839	-0.739845	-0.293982	-0.624071	-0.763886	0.830721	0.348906	-0.52605	-0.106754	0.403061	-0.884401	-0.0045221	0.490954	-0.709986	0.948292	-0.6561	-0.703693	0.326239	-0.711838	0.530605	-0.790398	-0.695464	0.281658	-0.630624	1	0.83878	0.950058	-0.186551	0.274271	0.774719	0.902246	-0.629123	-0.650164	0.777699	0.0931171
							Th	0.662584	-0.534264	-0.706771	-0.344912	0.440471	-0.67125	-0.689094	0.0567219	-0.693603	-0.238871	-0.617647	-0.571258	0.896022	0.317508	-0.288771	0.165972	0.540347	-0.742856	0.0923334	0.701501	-0.631744	0.830917	-0.670463	-0.773969	0.173514	-0.544298	0.654022	-0.575336	-0.764198	0.0403699	-0.498115	0.83878	1	0.853679	-0.208205	0.509617	0.607957	0.732999	-0.47643	-0.627496	0.822514	0.0352884
							Ti	0.802429	-0.661386	-0.692744	-0.316844	0.524028	-0.717991	-0.704431	-0.183337	-0.736243	-0.213668	-0.633565	-0.671607	0.864409	0.354112	-0.438311	-0.0660061	0.393592	-0.851614	-0.0230671	0.538978	-0.720834	0.965897	-0.645463	-0.723833	0.279183	-0.667839	0.531462	-0.720389	-0.738934	0.206939	-0.648334	0.950058	0.853679	1	-0.236125	0.353528	0.774977	0.900946	-0.637495	-0.679408	0.792641	0.111456
							Tl	-0.258607	0.57564	-0.0318187	0.341291	0.33446	0.588376	0.677331	0.480902	0.505301	0.192838	0.717677	0.310972	-0.319202	-0.277495	0.0979147	0.512457	0.00850807	0.263974	0.471598	0.225377	0.628446	-0.200477	0.415172	0.427595	0.640114	0.31736	0.235722	0.318535	0.431949	0.485403	0.596408	-0.186551	-0.208205	-0.236125	1	0.0853467	-0.343102	-0.20507	0.625315	0.733779	-0.439541	-0.120412
							U	-0.0908666	0.144566	-0.375674	0.0541307	0.0305804	-0.140659	-0.271154	0.452871	-0.108274	-0.0249895	-0.1207	0.0153089	0.586738	0.0643162	0.395522	0.507438	0.0844322	-0.074412	0.416787	0.578464	-0.101252	0.243582	-0.330261	-0.38741	-0.0411886	0.0519551	0.413378	0.113119	-0.452067	-0.294599	0.0830325	0.274271	0.509617	0.353528	0.0853467	1	-0.0449145	0.192336	-0.0463059	-0.154884	0.567059	0.0914415
							V	0.894967	-0.744799	-0.415561	-0.408858	0.347579	-0.772785	-0.689655	-0.556451	-0.683145	-0.176416	-0.704456	-0.562	0.577875	0.376674	-0.67811	-0.473335	0.394541	-0.776913	-0.395801	0.191632	-0.743879	0.779994	-0.459677	-0.599379	0.1151	-0.709003	0.275877	-0.762936	-0.542596	0.189486	-0.851796	0.774719	0.607957	0.774977	-0.343102	-0.0449145	1	0.775788	-0.733608	-0.681392	0.572091	0.0511566
							W	0.850965	-0.735149	-0.583401	-0.293062	0.581225	-0.686552	-0.664329	-0.326409	-0.709277	-0.229113	-0.598677	-0.781765	0.749323	0.353446	-0.557504	-0.224636	0.43024	-0.848431	-0.0865317	0.41491	-0.645984	0.930097	-0.622893	-0.667846	0.353624	-0.681785	0.461062	-0.821796	-0.643177	0.329747	-0.660218	0.902246	0.732999	0.900946	-0.20507	0.192336	0.775788	1	-0.663776	-0.634818	0.70204	0.064794
							Y	-0.676197	0.826804	0.360363	0.497067	-0.048146	0.826854	0.876283	0.737811	0.785918	0.29999	0.876502	0.649867	-0.611934	-0.388606	0.529171	0.660514	-0.18477	0.714876	0.436611	-0.0786586	0.874578	-0.614229	0.611399	0.723746	0.307849	0.75899	-0.114266	0.768497	0.675017	0.207133	0.866566	-0.629123	-0.47643	-0.637495	0.625315	-0.0463059	-0.733608	-0.663776	1	0.862498	-0.72519	-0.0923995
							Zn	-0.629112	0.794113	0.397743	0.43828	-0.0270954	0.865063	0.952934	0.493038	0.72288	0.402593	0.932234	0.576667	-0.719857	-0.421319	0.326689	0.460666	-0.268536	0.664135	0.32202	-0.147725	0.890151	-0.643259	0.720193	0.774305	0.360011	0.622889	-0.207675	0.672981	0.757823	0.314401	0.797599	-0.650164	-0.627496	-0.679408	0.733779	-0.154884	-0.681392	-0.634818	0.862498	1	-0.805982	-0.124427
							Zr	0.550319	-0.639598	-0.571603	-0.36785	0.188259	-0.74624	-0.878518	-0.16755	-0.668164	-0.360537	-0.771759	-0.557028	0.934872	0.339222	-0.186313	-0.0809226	0.298062	-0.671747	-0.00136166	0.447768	-0.768475	0.731953	-0.777518	-0.812695	-0.154571	-0.541956	0.408305	-0.584662	-0.8213	-0.281267	-0.590637	0.777699	0.822514	0.792641	-0.439541	0.567059	0.572091	0.70204	-0.72519	-0.805982	1	0.0789984
							Anatase	0.0571291	-0.0541117	0.00249472	-0.0739454	-0.160113	-0.0850149	-0.130838	-0.0712766	-0.0986355	0.0597811	-0.090236	-0.0676175	0.120522	-0.0393753	0.0448943	-0.0731815	-0.182125	-0.0718881	-0.0888867	-0.0739086	-0.0687363	0.0826331	-0.078279	-0.0217468	-0.108459	-0.0685851	-0.166511	-0.00509027	-0.0583948	0.00400247	-0.0688369	0.0931171	0.0352884	0.111456	-0.120412	0.0914415	0.0511566	0.064794	-0.0923995	-0.124427	0.0789984	1
							Anhydrite	0.249364	-0.180921	-0.466385	-0.278425	0.0880815	-0.113576	-0.27824	-0.057878	-0.257916	-0.272087	-0.255328	-0.206926	0.301678	0.0861011	-0.209112	-0.0156569	0.33379	-0.279883	0.139767	0.315521	-0.242236	0.22315	-0.347091	-0.302106	-0.0648217	-0.392317	0.41866	-0.277035	-0.262232	-0.135018	-0.148385	0.270772	0.309052	0.230576	0.0682635	0.115237	0.199103	0.216079	-0.243598	-0.234118	0.271297	-0.158329
							Calcite	0.538003	-0.55211	-0.155288	-0.265004	0.221386	-0.453807	-0.45284	-0.498743	-0.557434	-0.0967662	-0.4372	-0.517923	0.313874	0.464527	-0.532705	-0.42847	-0.0198486	-0.542481	-0.347884	-0.0580352	-0.540147	0.448538	-0.394391	-0.300132	-0.0394766	-0.572507	-0.0611027	-0.59232	-0.259712	0.167215	-0.509299	0.474769	0.240218	0.45698	-0.418363	-0.218151	0.493902	0.480357	-0.570743	-0.468756	0.360222	0.131016
							K-Feldspars	-0.121053	-0.0449241	-0.318832	-0.0685772	-0.0755452	-0.0646883	-0.253539	0.155797	-0.18116	-0.165416	-0.135287	-0.13727	0.315366	0.134257	0.163936	0.16936	0.0384907	-0.12207	0.186304	0.369837	-0.121715	0.119864	-0.478656	-0.300686	-0.150802	-0.0967782	0.288144	-0.0186001	-0.3253	-0.209261	-0.00516026	0.106552	0.229585	0.108739	-0.130494	0.367602	-0.127606	0.107041	-0.112365	-0.203779	0.306062	0.0238893
							Phyllosilicates	-0.0386534	0.0675021	0.389649	0.155995	0.0101996	0.0765955	0.256275	-0.0534937	0.13793	0.250879	0.132471	0.120197	-0.371011	-0.0662477	-0.139995	-0.112877	-0.101505	0.145698	-0.265794	-0.272591	0.203204	-0.170411	0.374661	0.24934	0.0744765	0.138361	-0.298554	0.0857135	0.32131	0.107758	0.0204808	-0.207778	-0.208813	-0.220095	-0.0353284	-0.326442	0.00377033	-0.154164	0.155914	0.231773	-0.317661	-0.384579
							Plagioclase	-0.51629	0.406482	0.466321	0.216798	-0.193532	0.469797	0.378939	0.14808	0.511574	0.223561	0.387519	0.43689	-0.404741	-0.365947	0.453923	0.0608491	-0.247286	0.569459	0.0268673	-0.345173	0.459449	-0.559368	0.420068	0.543606	-0.124594	0.464346	-0.377109	0.517587	0.455904	-0.125329	0.494067	-0.524328	-0.494445	-0.481351	0.187342	0.00321961	-0.506835	-0.455103	0.342683	0.375701	-0.367171	0.26932
							Pyrite	0.185959	0.0390596	-0.636943	-0.166587	0.265156	-0.0613882	0.00958241	0.165223	-0.208758	-0.289035	0.024059	-0.188108	0.178564	0.0193802	-0.191407	0.197174	0.336163	-0.337936	0.341378	0.519209	-0.00739125	0.240624	-0.189145	-0.273769	0.344232	-0.254214	0.654205	-0.210268	-0.252899	0.278076	0.0093992	0.25546	0.288991	0.204588	0.297793	0.0208358	0.0551637	0.183328	0.0613482	-0.00237652	0.0652162	-0.0579096
							Quartz	0.0820852	-0.107957	-0.226103	0.0491089	-0.024114	-0.186426	-0.146416	0.0270037	-0.105232	-0.186168	-0.0893967	-0.0542171	0.26622	0.0907157	0.104018	0.138357	0.0671316	-0.0772558	0.247756	0.153555	-0.246937	0.142675	-0.185333	-0.274683	-0.0124496	-0.0116156	0.183565	-0.0345474	-0.202891	-0.0838372	-0.114708	0.165162	0.176283	0.180686	0.0745018	0.196445	0.0834192	0.0748479	-0.124362	-0.165548	0.237604	0.0475069
							Siderite	-0.173257	0.121396	0.343641	-0.0167221	-0.287857	0.0426553	0.000671333	-0.109421	0.266147	-0.00512868	-0.0388118	0.300423	-0.182932	-0.0305513	0.121456	-0.146235	-0.152289	0.247833	-0.0387178	-0.245256	0.036689	-0.253642	0.179439	0.12892	-0.259973	0.20886	-0.271048	0.133515	0.0517786	-0.273951	-0.0371522	-0.208961	-0.2272	-0.213981	-0.091499	-0.0109308	-0.0259001	-0.218062	-0.0031055	-0.0205627	-0.0653206	-0.0365278
							Zeolites	0.3502	-0.316426	-0.256886	-0.27808	0.203546	-0.280594	-0.37132	-0.183971	-0.335274	-0.125087	-0.340798	-0.282025	0.352684	0.153591	-0.204076	-0.10886	0.435009	-0.295656	-0.145742	0.248799	-0.329596	0.328745	-0.285016	-0.32107	-0.0105674	-0.319555	0.298404	-0.336092	-0.32604	-0.0398886	-0.317233	0.334873	0.384968	0.333571	-0.180305	0.105765	0.336543	0.355655	-0.326629	-0.29186	0.316991	-0.215286
							TOC	-0.622004	0.78748	0.255089	0.39675	-0.00162122	0.850467	0.892692	0.508768	0.753597	0.230511	0.896614	0.603965	-0.680762	-0.427706	0.322082	0.474405	-0.154002	0.622678	0.455807	-0.0462339	0.883679	-0.618415	0.618104	0.688687	0.373626	0.593758	-0.0270466	0.598473	0.669497	0.275742	0.819361	-0.627373	-0.581906	-0.656611	0.77836	-0.139917	-0.674552	-0.605924	0.854363	0.901181	-0.763088	-0.168341
							S	0.509622	-0.262584	-0.824698	-0.248444	0.512325	-0.381059	-0.323999	0.0710025	-0.506068	-0.392551	-0.299405	-0.458501	0.58123	0.153567	-0.322768	0.218716	0.661646	-0.632547	0.406608	0.826722	-0.286877	0.643313	-0.536744	-0.639057	0.439215	-0.458058	0.94527	-0.512826	-0.613712	0.258625	-0.249503	0.639872	0.710334	0.623286	0.164511	0.346506	0.378366	0.604087	-0.24786	-0.292931	0.46992	-0.165638
							C/S	-0.751132	0.584601	0.796654	0.37265	-0.460327	0.738242	0.677688	0.209634	0.80491	0.378799	0.658439	0.679299	-0.805205	-0.346353	0.479435	0.0651355	-0.565812	0.857266	-0.0746659	-0.703401	0.667176	-0.846182	0.714675	0.844681	-0.212561	0.696882	-0.772536	0.725039	0.808691	-0.143157	0.620534	-0.853136	-0.864125	-0.849826	0.211414	-0.343605	-0.66663	-0.807786	0.616837	0.656577	-0.745988	0.0417333
							IR	0.448524	-0.616847	-0.277155	-0.40464	-0.00625132	-0.694608	-0.806439	-0.395907	-0.660909	-0.150446	-0.775653	-0.469059	0.64563	0.415434	-0.244682	-0.381553	0.0876008	-0.532325	-0.463759	0.127956	-0.762858	0.488656	-0.651972	-0.615066	-0.379358	-0.556719	0.0570844	-0.480736	-0.599047	-0.318227	-0.671763	0.48394	0.511981	0.527053	-0.637798	0.205396	0.521687	0.480044	-0.727087	-0.755593	0.704041	0.155954
							Carb.	-0.455561	0.613827	0.287122	0.40063	-0.00300622	0.697567	0.811504	0.395405	0.658371	0.148478	0.777853	0.465414	-0.651451	-0.415353	0.247728	0.38178	-0.0927912	0.538515	0.466219	-0.137724	0.766299	-0.500361	0.652274	0.62164	0.370081	0.559615	-0.0665006	0.490136	0.60711	0.311778	0.674964	-0.491816	-0.520123	-0.53898	0.634024	-0.217604	-0.534842	-0.491214	0.728361	0.761234	-0.707213	-0.161794
							Mean	-0.557924	0.227006	0.188702	0.0972548	-0.627301	0.131021	-0.0691489	0.358085	0.346753	-0.172237	-0.0257405	0.416999	-0.0265134	-0.281112	0.795687	0.301446	-0.0168941	0.514148	0.25034	-0.0633742	0.113674	-0.380697	-0.121508	-0.0209947	-0.509573	0.509337	-0.112271	0.507028	-0.0641286	-0.754868	0.2055	-0.370529	-0.113843	-0.285424	-0.235684	0.345027	-0.402321	-0.430102	0.152298	-0.0276284	0.0668269	0.04644
							Sorting	0.135188	-0.376537	-0.147382	-0.34954	-0.17177	-0.373244	-0.534549	-0.0835419	-0.0886622	-0.565106	-0.519646	-0.104069	0.331556	0.0598558	0.218569	-0.057466	0.471255	-0.0642407	0.0554923	0.0612052	-0.386396	0.191418	-0.466906	-0.427263	-0.284507	-0.0146724	0.214549	-0.173336	-0.45535	-0.540466	-0.331693	0.212003	0.32093	0.231458	-0.406599	0.19321	0.261443	0.169829	-0.356826	-0.502147	0.447615	-0.0371206
							Kurt	0.238697	-0.389557	-0.0847505	-0.276358	-0.264646	-0.594417	-0.66928	-0.38253	-0.493272	-0.0273039	-0.685875	-0.142772	0.428837	0.293302	-0.108326	-0.441026	-0.110006	-0.352907	-0.531831	0.0128751	-0.622996	0.240301	-0.403858	-0.395812	-0.533306	-0.40877	-0.0791438	-0.292383	-0.440733	-0.460965	-0.540725	0.26184	0.30967	0.318244	-0.604056	0.118207	0.370573	0.226532	-0.616392	-0.635508	0.530336	0.107471
							Mode 1	-0.0630085	-0.161064	0.262706	-0.0900501	-0.181715	-0.0762777	-0.196111	-0.0726786	0.120741	-0.233425	-0.142086	0.0897582	-0.00963304	-0.0133504	0.215742	-0.0939801	0.149503	0.245821	-0.0566009	-0.183819	-0.0950415	-0.0982588	-0.092947	-0.113282	-0.17088	0.190099	-0.144433	0.0460482	-0.0432954	-0.320494	-0.156032	-0.0925386	-0.0384635	-0.099324	-0.167966	0.00857564	0.0780639	-0.021523	-0.122852	-0.159165	0.0811601	-0.0639145
							Mode 2	-0.0264091	0.0543219	-0.17446	-0.109504	-0.0616082	0.0770255	0.0802924	-0.0193146	-0.0316496	-0.0034917	0.0240474	-0.106277	-0.0474104	0.021097	-0.0663186	0.00232171	-0.0789328	-0.115789	0.0882239	0.0524208	0.0490912	0.00149954	-0.037113	0.0787028	0.00227344	-0.0800519	0.0779172	-0.0733926	-0.0276978	0.0530785	0.122703	-0.000536082	-0.0529877	0.0172201	-0.0204892	-0.0201969	-0.140504	-0.0420141	-0.00745111	0.0327057	-0.0226355	0.0509588
							Sand Fraction	-0.67516	0.381175	0.241025	0.255174	-0.627031	0.281694	0.109624	0.47778	0.44598	-0.0215923	0.157111	0.483728	-0.130033	-0.352478	0.85513	0.399261	-0.104226	0.613958	0.321338	-0.0708546	0.294145	-0.488578	0.0191811	0.121686	-0.458524	0.612183	-0.168226	0.632494	0.0710287	-0.664443	0.376992	-0.48941	-0.216733	-0.398388	-0.112554	0.361344	-0.552409	-0.538776	0.319106	0.151345	-0.0707726	0.0700993
							Fine Fraction	0.67516	-0.381175	-0.241025	-0.255174	0.627031	-0.281694	-0.109624	-0.47778	-0.44598	0.0215923	-0.157111	-0.483728	0.130033	0.352478	-0.85513	-0.399261	0.104226	-0.613958	-0.321338	0.0708546	-0.294145	0.488578	-0.0191811	-0.121686	0.458524	-0.612183	0.168226	-0.632494	-0.0710287	0.664443	-0.376992	0.48941	0.216733	0.398388	0.112554	-0.361344	0.552409	0.538776	-0.319106	-0.151345	0.0707726	-0.0700993
							Coarse Sand	-0.165449	-0.163025	-0.00344559	-0.145401	-0.438577	-0.264698	-0.473837	0.0869904	0.0203514	-0.303268	-0.416573	0.0992313	0.307717	-0.0421328	0.513173	0.0424604	0.144044	0.139133	0.0543252	0.00572843	-0.277168	0.00330703	-0.380813	-0.267926	-0.540475	0.147641	-0.0252492	0.114283	-0.358833	-0.761123	-0.181836	0.0288942	0.191991	0.10396	-0.4251	0.354622	0.00525892	-0.0731678	-0.253673	-0.411146	0.418467	0.106341
							Medium Sand	-0.13491	-0.219127	-0.121013	-0.183918	-0.485792	-0.29391	-0.524401	0.131487	-0.0562723	-0.442155	-0.463106	0.0420669	0.375086	-0.0138174	0.514645	0.115488	0.229987	0.0989752	0.176119	0.0879286	-0.312596	0.0614996	-0.48125	-0.420644	-0.541892	0.120575	0.0853517	0.0639882	-0.452787	-0.78211	-0.19143	0.0695478	0.287764	0.139308	-0.498029	0.406697	0.0218982	-0.0236612	-0.276383	-0.489862	0.487489	0.131946
							Fine Sand	-0.766305	0.456946	0.487607	0.278284	-0.649726	0.459343	0.274363	0.430975	0.642432	0.0423767	0.334821	0.590772	-0.360214	-0.429908	0.855575	0.3563	-0.214093	0.800562	0.245172	-0.290648	0.414182	-0.656014	0.211742	0.311277	-0.427956	0.731229	-0.379044	0.726037	0.309941	-0.609265	0.463196	-0.652948	-0.434773	-0.59083	-0.0145973	0.189388	-0.619996	-0.663494	0.424817	0.306831	-0.273754	-0.000345162
[truncated: 24 more columns]
